|                                                                                                                                                                                                                                                                                                                         |    |
|-------------------------------------------------------------------------------------------------------------------------------------------------------------------------------------------------------------------------------------------------------------------------------------------------------------------------|----|
| RESEARCH ARTICLE                                                                                                                                                                                                                                                                                                        | 1  |
|                                                                                                                                                                                                                                                                                                                         | 2  |
| <b>Vacuolar processing enzyme translocates to the vacuole through the autophagy pathway to induce programmed cell death</b>                                                                                                                                                                                             | 3  |
|                                                                                                                                                                                                                                                                                                                         | 4  |
|                                                                                                                                                                                                                                                                                                                         | 5  |
| Paula Teper-Bamnolker, <sup>a</sup> Raz Danieli, <sup>a,b</sup> Hadas Peled-Zehavi, <sup>c</sup> Eduard Belausov, <sup>d</sup> Mohamad Abu-Abied, <sup>d</sup> Tamar Avin-Wittenberg, <sup>e</sup> Einat Sadot, <sup>d</sup> and Dani Eshel <sup>a,*</sup>                                                              | 6  |
|                                                                                                                                                                                                                                                                                                                         | 7  |
|                                                                                                                                                                                                                                                                                                                         | 8  |
|                                                                                                                                                                                                                                                                                                                         | 9  |
| <sup>a</sup> Department of Postharvest and Food Sciences, The Volcani Center, ARO, Rishon LeZion, Israel                                                                                                                                                                                                                | 10 |
|                                                                                                                                                                                                                                                                                                                         | 11 |
| <sup>b</sup> Institute of Plant Sciences and Genetics in Agriculture, The Robert H. Smith Faculty of Agriculture, Food and Environment, The Hebrew University of Jerusalem, Rehovot 76100, Israel                                                                                                                       | 12 |
|                                                                                                                                                                                                                                                                                                                         | 13 |
|                                                                                                                                                                                                                                                                                                                         | 14 |
| <sup>c</sup> Department of Plant and Environmental Sciences, The Weizmann Institute of Science, Rehovot 76100, Israel                                                                                                                                                                                                   | 15 |
|                                                                                                                                                                                                                                                                                                                         | 16 |
| <sup>d</sup> Department of Ornamental Horticulture, The Volcani Center, ARO, Rishon LeZion, Israel                                                                                                                                                                                                                      | 17 |
|                                                                                                                                                                                                                                                                                                                         | 18 |
| <sup>e</sup> Department of Plant and Environmental Sciences, Alexander Silberman Institute of Life Sciences, The Hebrew University of Jerusalem, Givat Ram, Jerusalem, 9190401, Israel                                                                                                                                  | 19 |
|                                                                                                                                                                                                                                                                                                                         | 20 |
|                                                                                                                                                                                                                                                                                                                         | 21 |
| *Address correspondence to: <a href="mailto:dani@agri.gov.il">dani@agri.gov.il</a>                                                                                                                                                                                                                                      | 22 |
|                                                                                                                                                                                                                                                                                                                         | 23 |
| <b>Short title:</b> VPE is activated by autophagy                                                                                                                                                                                                                                                                       | 24 |
|                                                                                                                                                                                                                                                                                                                         | 25 |
| <b>One sentence summary:</b> Carbon starvation induced programmed cell death by trafficking vacuolar processing enzyme through the autophagy pathway to the vacuole.                                                                                                                                                    | 26 |
|                                                                                                                                                                                                                                                                                                                         | 27 |
|                                                                                                                                                                                                                                                                                                                         | 28 |
|                                                                                                                                                                                                                                                                                                                         | 29 |
| The author responsible for distribution of materials integral to the findings presented in this article in accordance with the policy described in the Instructions for Authors ( <a href="http://www.plantcell.org">www.plantcell.org</a> ) is: Dani Eshel ( <a href="mailto:dani@agri.gov.il">dani@agri.gov.il</a> ). | 30 |
|                                                                                                                                                                                                                                                                                                                         | 31 |
|                                                                                                                                                                                                                                                                                                                         | 32 |
|                                                                                                                                                                                                                                                                                                                         | 33 |
|                                                                                                                                                                                                                                                                                                                         | 34 |

35  
**Abstract** 36  
37  
The caspase-like vacuolar processing enzyme (VPE) is a key factor in 38  
programmed cell death (PCD) associated with plant stress responses. Growth 39  
medium lacking a carbon source and dark conditions caused punctate labeling 40  
of 35S::VPE1-GFP (StVPE1-GFP) in potato leaves. Carbon starvation of BY-2 41  
cells induced higher VPE activity and PCD symptoms. Growing VPE-RNAi BY- 42  
2 cells without sucrose reduced VPE activity and prevented PCD symptoms. 43  
During extended exposure to carbon starvation, VPE expression and activity 44  
levels peaked, with a gradual increase in BY-2 cell death. Histological analysis 45  
of StVPE1-GFP in BY-2 cells showed that carbon starvation induces its 46  
translocation from the endoplasmic reticulum to the central vacuole, through 47  
tonoplast engulfment. Exposure of BY-2 culture to the autophagy inhibitor 48  
concanamycin A caused autophagic bodies accumulation in the cell vacuole. 49  
Such accumulation did not occur in the presence of 3-methyladenine, an 50  
inhibitor of early-stage autophagy. BY-2 cells constitutively expressing 51  
StATG8IL-RFP, an autophagosome marker, showed colocalization with the 52  
StVPE1-GFP protein in the cytoplasm and vacuole. RNAi silencing of the core 53  
autophagy component *ATG4* in BY-2 cells reduced VPE activity and cell death. 54  
These results are the first to suggest that VPE translocates to the cell vacuole 55  
through the autophagy pathway, leading to PCD. 56

## INTRODUCTION

57

58

Programmed cell death (PCD) is involved in almost all stages of the plant's life cycle and can be developmental or stress-induced (Devillard and Walter, 2014; Escamez and Tuominen, 2014). During the course of their ontogenesis, plants are continuously exposed to a large variety of abiotic stress factors which can damage tissues and jeopardize the survival of the organism unless properly countered (Petrov et al., 2015). When the intensity of a stress is high, one defense program employed by plants is the induction of PCD (Suzuki et al., 2012; Del Río, 2015).

66

In animals, three main types of PCD mechanisms are distinguished: apoptosis, autophagy and necrosis. These PCD categories are based mainly on cell morphology, rather than on biochemical features (Kroemer et al., 2008). In plants, based on morphology, it has been suggested that tonoplast rupture distinguishes two large classes of PCD, 'autolytic' and 'non-autolytic'. The first occurs mainly during normal plant development and after mild abiotic stress (developmental PCD), and the second is found mainly in response to pathogen invasion (hypersensitive response [HR]-related PCD; van Doorn et al., 2011).

74

PCD often requires the activity of serine and/or cysteine proteases (Pak and Van Doorn, 2005; Schaller et al., 2018). A large number of animal PCD pathways involve cysteine proteases called caspases (reviewed by Crawford and Wells, 2011; Miao et al., 2011; White et al., 2017). Although surveys of plant genomes have not revealed any 'true' caspases or close orthologs of animal caspases, proteases with activities similar to those of animal caspases have been reported during plant PCD, termed caspase-like proteases (CLPs; Woltering et al., 2002; Belenghi et al., 2004; Iakimova and Woltering, 2017). Caspase inhibitors inhibit PCD in plants, suggesting that the plant CLPs are distantly related to the caspases found in animals; alternatively, they may be unrelated proteins that have converged by evolutionary selection to have active sites that recognize the same substrates (Watanabe and Lam, 2004; Vacca et al., 2006; Bonneau et al., 2008).

87

Plant CLPs have been identified as either metacaspases or vacuolar processing enzymes (VPEs; Hatsugai et al., 2004; Rojo et al., 2004; Vercammen et al., 2004). Metacaspases have arginine/lysine-specific

90

endopeptidase activity, unlike caspases that cleave their substrates at aspartic acid residues (Silva et al., 2005; Van Durme and Nowack, 2016). The VPE proteins belong to a family of cysteine proteinases that are well conserved among a variety of organisms, including many plant and animal species (Cai and Gallois, 2015; Hatsugai et al., 2015; Sueldo and van der Hoorn, 2017). VPEs were originally found to be responsible for the maturation of seed storage proteins and various other vacuolar proteins in plants (Hara-Nishimura et al., 1991; Hara-Nishimura et al., 1993; Hatsugai et al., 2004). VPE, which is released into the vacuole during PCD, triggers the degradation of other proteins (Hara-Nishimura et al., 2005; Kuroyanagi et al., 2005; Van Durme and Nowack, 2016). VPEs, which exhibit caspase-1-like activity, play important roles in plant PCD, be it developmental or in response to biotic or abiotic stress (reviewed by Hatsugai et al., 2015; Vorster et al., 2019). Specifically, VPE has been characterized as a major factor in the HR. By silencing the gene encoding VPE, Hatsugai et al. (2004) showed that vacuolar collapse, caused by VPE activity, seems to be required for virus-induced HR-related PCD in tobacco (*Nicotiana tabacum*) plants. VPEs have also been found to contribute to PCD in other HR-related systems, such as mycotoxin-induced PCD, where the knockout of *VPE $\gamma$*  resulted in less PCD (Rojo et al., 2004; Yamada et al., 2004). Single-silenced (*NbVPE1a*) or dual-silenced (*NbVPE1a/b*) *Nicotiana benthamiana* plants also failed to show HR-related PCD after treatment with the bacterial toxin harpin (Zhang et al., 2010). In other examples, a mutation in *VPE $\gamma$*  reduced PCD induced by the necrotrophic pathogen *Botrytis cinerea* in *Arabidopsis* (Rojo et al., 2004), and knockout of all four VPE genes in *Arabidopsis* prevented the effect of fumonisin B1, a toxin secreted by the necrotrophic fungus *Fusarium moniliforme*, and also prevented disappearance of the tonoplast (Kuroyanagi et al., 2005).

Autophagy is a conserved intracellular trafficking pathway in eukaryotes for the degradation and recycling of cellular components. In plants, autophagy is activated in response to developmental or environmental cues and is essential for plant growth, maintenance of cellular homeostasis, and overcoming biotic and abiotic stresses (for recent reviews see Avin-Wittenberg et al., 2018; Marshall and Vierstra 2018; Wang et al., 2018). Autophagy in plants can be broadly divided into microautophagy and macroautophagy (Galluzzi et al.,

2017). The former is characterized by trapping of the cytosolic material to be 125  
degraded in tonoplast invaginations, followed by tonoplast scission to release 126  
the intravacuolar vesicles. The better characterized macroautophagy pathway 127  
(hereafter referred to as autophagy) involves the sequestration of cytoplasmic 128  
constituents in a de-novo formed double-membrane organelle—the 129  
autophagosome—that is transported to the vacuole for degradation. Both 130  
processes can be either selective or non-selective with respect to the 131  
cytoplasmic material that is being degraded. The core mechanism of 132  
autophagy is mediated by an evolutionarily well-conserved set of AuTophaGy- 133  
related, or ATG, genes (Tsukada and Ohsumi, 1993; Klionsky et al., 2016; 134  
Galluzzi et al., 2017). A central protein of both selective and non-selective 135  
autophagy is ATG8, which in plants exists as a gene family. Lipidated ATG8 is 136  
located on both the outer and inner membrane of the autophagosome, and is 137  
involved in all stages of autophagosome formation, as well as in the 138  
recognition of specific cargo targeted for selective autophagy (Kellner et al., 139  
2017). As ATG8 is found on the autophagosome from its formation to its lytic 140  
destruction in the vacuole, it is the most commonly used marker for 141  
autophagosomes. 142

Potato (*Solanum tuberosum*) VPE1 (StVPE1) has been shown to be 143  
involved in the PCD response of the stem apical meristem to abiotic stress 144  
(Teper-Bamnlker et al., 2012; Teper-Bamnlker et al., 2017). Following the 145  
stress, induction of StVPE1 in the stem meristem induces loss of apical 146  
dominance and stem branching. The mature StVPE1 protein exhibits specific 147  
activity for caspase-1, with optimal activity at acidic pH, consistent with its 148  
established vacuolar localization (Teper-Bamnlker et al., 2017). 149  
Downregulation of StVPE1 by RNA interference (RNAi) or overexpression of 150  
green fluorescent protein-labeled *StVPE1* (*StVPE1-GFP*) results in reduced or 151  
enhanced stem branching, respectively (Teper-Bamnlker et al., 2017). 152  
However, the role of StVPE1 as a general executor of PCD is not clear. In this 153  
study, we show for the first time the importance of VPE as an executor of plant 154  
PCD during carbon starvation. Moreover, using a cell culture model system, 155  
we suggest that VPE is translocated to the cell vacuole through the autophagy 156  
pathway. 157

|                                                                                                                                                                                                                                                                                                                                                                                                                                                                                                                                                                                                                                                                                                                                                                                                                                                                                                                                                                                                                                                                                                                                                                                                                                     |                                                                                                              |
|-------------------------------------------------------------------------------------------------------------------------------------------------------------------------------------------------------------------------------------------------------------------------------------------------------------------------------------------------------------------------------------------------------------------------------------------------------------------------------------------------------------------------------------------------------------------------------------------------------------------------------------------------------------------------------------------------------------------------------------------------------------------------------------------------------------------------------------------------------------------------------------------------------------------------------------------------------------------------------------------------------------------------------------------------------------------------------------------------------------------------------------------------------------------------------------------------------------------------------------|--------------------------------------------------------------------------------------------------------------|
|                                                                                                                                                                                                                                                                                                                                                                                                                                                                                                                                                                                                                                                                                                                                                                                                                                                                                                                                                                                                                                                                                                                                                                                                                                     | 158                                                                                                          |
| <b>RESULTS</b>                                                                                                                                                                                                                                                                                                                                                                                                                                                                                                                                                                                                                                                                                                                                                                                                                                                                                                                                                                                                                                                                                                                                                                                                                      | 159                                                                                                          |
|                                                                                                                                                                                                                                                                                                                                                                                                                                                                                                                                                                                                                                                                                                                                                                                                                                                                                                                                                                                                                                                                                                                                                                                                                                     | 160                                                                                                          |
| <b>StVPE1 Plays a Role in the Response to Carbon Deficiency in Potato Leaves</b>                                                                                                                                                                                                                                                                                                                                                                                                                                                                                                                                                                                                                                                                                                                                                                                                                                                                                                                                                                                                                                                                                                                                                    | 161                                                                                                          |
|                                                                                                                                                                                                                                                                                                                                                                                                                                                                                                                                                                                                                                                                                                                                                                                                                                                                                                                                                                                                                                                                                                                                                                                                                                     | 162                                                                                                          |
|                                                                                                                                                                                                                                                                                                                                                                                                                                                                                                                                                                                                                                                                                                                                                                                                                                                                                                                                                                                                                                                                                                                                                                                                                                     | 163                                                                                                          |
| The roles for VPE in developmental PCD, as well as in plant responses to pathogen attack, are well documented (for recent review see Kabbage et al., 2017; Shimada et al., 2018). However, although VPE has also been implicated in the response to several abiotic stresses (Shimada et al., 2018), much less is known about this aspect of its activity. To look into the possible roles of VPE and PCD in the response to carbon starvation, transgenic potato plants expressing StVPE1-GFP were grown with or without sucrose under light (long day) or dark growth conditions. GFP fluorescence was detected in the peripheral part of the cell (probably the cytoplasm) in leaves grown under long-day conditions, regardless of whether sucrose was added to the medium (Figures 1A and 1C). Similar StVPE1-GFP localization was observed in plants grown under dark conditions with the addition of sucrose (Figure 1B). Surprisingly, combining dark conditions with carbon starvation changed the fluorescence pattern of StVPE1 in the leaves markedly, with GFP labeling in multiple puncta and occasionally, in bigger clusters (Figure 1D), suggesting relocalization of VPE in the cell following carbon starvation. | 164<br>165<br>166<br>167<br>168<br>169<br>170<br>171<br>172<br>173<br>174<br>175<br>176<br>177<br>178<br>179 |
|                                                                                                                                                                                                                                                                                                                                                                                                                                                                                                                                                                                                                                                                                                                                                                                                                                                                                                                                                                                                                                                                                                                                                                                                                                     | 180                                                                                                          |
| <b>Silencing VPE Activity in BY-2 Cells Prevents PCD Induced by Carbon Starvation</b>                                                                                                                                                                                                                                                                                                                                                                                                                                                                                                                                                                                                                                                                                                                                                                                                                                                                                                                                                                                                                                                                                                                                               | 181                                                                                                          |
|                                                                                                                                                                                                                                                                                                                                                                                                                                                                                                                                                                                                                                                                                                                                                                                                                                                                                                                                                                                                                                                                                                                                                                                                                                     | 182                                                                                                          |
|                                                                                                                                                                                                                                                                                                                                                                                                                                                                                                                                                                                                                                                                                                                                                                                                                                                                                                                                                                                                                                                                                                                                                                                                                                     | 183                                                                                                          |
| VPE is considered a PCD executor in plant systems in response to several biotic and abiotic stresses (reviewed by Hatsugai et al., 2015; Vorster et al., 2019). Phylogenetic analysis has shown that StVPE1, classified as a vegetative-type VPE, has high sequence similarity and conserved regions with tobacco <i>NtVPE-1a</i> , <i>NtVPE-1b</i> , <i>NtVPE-2</i> and <i>NtVPE-3</i> (Teper-Bamnlker et al., 2017; Supplementary data 1A). To study its role in PCD induction, VPE-RNAi-expressing BY-2 lines were produced, and their PCD response was compared to that in wild-type (WT) cells. Alignment of VPE cDNA from potato                                                                                                                                                                                                                                                                                                                                                                                                                                                                                                                                                                                              | 184<br>185<br>186<br>187<br>188<br>189<br>190<br>191                                                         |

and tobacco showed a 500-bp sequence of *StVPE1* cDNA that was 83–90% similar to tobacco *NtVPE-1a*, *NtVPE-1b*, *NtVPE-2* and *NtVPE-3*, and 67–72% similar to the tobacco *VPEs* *NtPB1*, *NtPB2* and *NtPB3* which were ligated in tandem in opposite directions to produce *VPE-RNAi* lines of BY-2 cells (Supplemental Data Set 1B).

WT and *VPE-RNAi* BY-2 cells were moved to a sucrose-free medium, and *VPE* activity was examined. After 2.5 or 8 h without sucrose, *VPE* activity was 11- and 21-fold higher, respectively, than that in the sucrose-containing culture (Figure 2A). When *VPE-RNAi* cells were grown under the same conditions, *VPE* activity was nearly undetectable after 2.5 h of exposure and only 10-fold higher than in the sucrose-containing culture after 8 h (Figure 2A). To determine whether *VPE* activity induces PCD in carbon-starved BY-2 cells, we examined cell cultures by terminal deoxynucleotidyl transferase (Tdt)-mediated deoxy-uridinetriphosphate (dUTP) nick end labeling (TUNEL) assay. Twenty-four hours after the initiation of carbon starvation, only WT cells showed TUNEL-positive labeling, whereas no labeling was observed in the *VPE-RNAi* cells (Figure 2B). Staining of carbon-starved BY-2 cells with Evans blue showed 50% less cell death in the *VPE-RNAi* line (Figure 2C). The results suggested that *VPE* activity is involved in inducing PCD in BY-2 cells in response to carbon starvation.

### **Gradual Cell Death in Response to Carbon Starvation Correlates to *VPE* Expression**

The population of BY-2 cells tended to lose their viability gradually over time of exposure to carbon starvation (Figure 3A). To look at the correlation between cell death and *VPE*, we analyzed *VPE* expression and activity during the course of carbon starvation (Figures 3B and 3C). Transcription analysis of WT BY-2 cells showed that *VPE* expression is upregulated during the first 24 h of carbon starvation, and then its level stabilizes to 96 h of carbon starvation (Figure 3B). *VPE* activity was upregulated during the first 48 h followed by downregulation when incubation was extended to 72–96 h (Figure 3C), suggesting a possible post-transcriptional regulatory mechanism of *VPE* activity. However, progressive cell death continued.

226

## **VPE1 Relocalizes to Vesicles under Carbon Starvation**

227

228

To study the mechanism of VPE activation under carbon starvation, StVPE1-GFP was stably expressed in BY-2 cells. It showed a reticular pattern under standard growth conditions and colocalized with an endoplasmic reticulum (ER) marker (ER-Rb; 35s::mCherry-HDEL) (Nelson et al., 2007), as expected for immature VPE (Fig. 4A; Kuroyanagi et al., 2002). However, following 24–48 h of carbon starvation, StVPE1-GFP was no longer observed on the ER, but had relocalized to punctate structures with a diameter of 0.2 to 0.48  $\mu\text{m}$  (Figure 4B and Supplemental Figure 1C). Under these conditions, the ER remained intact, suggesting that the cell is still viable (Supplemental Figure 1). As VPE needs to be mobilized from the ER to the vacuole to exert its proteolytic pro-PCD activity, the vesicles containing VPE-labeled puncta are likely to be its means of transport. Coexpression of StVPE1-GFP and a tonoplast-red fluorescent protein (RFP) marker (Nelson et al., 2007) in the transgenic BY-2 cell line suggested that the visualized StVPE1-containing puncta are found in the cytoplasm (Figure 4B).

229

230

231

232

233

234

235

236

237

238

239

240

241

242

243

To shed more light on the StVPE1-GFP-labeled vesicle type, we used a Golgi-RFP marker (GmMan1-RFP; Nelson et al., 2007). No colocalization was detected between StVPE1-GFP puncta and the Golgi-RFP marker following 48 h of carbon starvation (Figure 5). These results suggested that the transport of StVPE1 does not involve the Golgi apparatus upon carbon starvation.

244

245

246

247

248

249

## **VPE1 Is Transported to the Central Vacuole Following Carbon Starvation**

250

251

To determine whether the StVPE1-GFP puncta eventually translocate to the vacuole, a BY-2 cell line stably expressing StVPE1-GFP and a tonoplast-RFP marker was exposed to carbon starvation. Formation of vesicles containing StVPE1-GFP-labeled bodies attached to the tonoplast was observed after 72 h of starvation (Figure 6A). Concanamycin A (ConcA) is a specific inhibitor of vacuolar type  $\text{H}^+$ -ATPase (V-ATPase) activity, resulting in an increase in vacuolar pH and inhibition of vacuolar enzyme activity (Tamura et al., 2003; Hanamata et al., 2013; Tamura et al., 2013). Thus ConcA treatment facilitates

252

253

254

255

256

257

258

259



detection of the pH-sensitive fluorescence of GFP in the vacuole, and prevents 260  
the degradation of autophagosomes in the vacuolar lumen, resulting in the 261  
accumulation of autophagic bodies (Yoshimoto et al., 2004; Thompson et al., 262  
2005; Xiong et al., 2007). In BY-2 cells under carbon starvation and treated 263  
with ConcA, StVPE1-labeled puncta clearly accumulated in the vacuole 264  
(Figures 6B and 6E). Similar results were obtained with the acid-insensitive 265  
fluorescent tag RFP, fused to StVPE1 (Supplemental Figure 2C), suggesting 266  
that StVPE1 might be transported to the vacuole by autophagy. In contrast, no 267  
signal could be detected in the vacuole after exposure to ConcA treatment in a 268  
medium that contained sucrose (Figure 6D). To verify the involvement of 269  
autophagy in StVPE1 transport to the vacuole, 3-methyladenine (3-MA), a 270  
phosphoinositide 3-kinase (PI3K) inhibitor, was used. PI3K plays an essential 271  
role in the formation of autophagosomes (reviewed by He and Klionsky, 2009), 272  
and 3-MA has been shown to inhibit autophagy in eukaryotic cells, including 273  
BY-2 cells (Takatsuka et al., 2004). Exposure of a BY-2 cell line stably 274  
expressing StVPE1-GFP and  $\gamma$ -TIP-RFP to ConcA and 3-MA under carbon 275  
starvation prevented the accumulation of StVPE1-GFP-labeled puncta inside 276  
the vacuole (Figures 6C and 6E), confirming that these puncta are autophagic 277  
bodies. This suggested that StVPE1 accumulation in the cell vacuole as a 278  
result of carbon starvation is facilitated by an autophagy-like pathway. 279

### **VPE1 Colocalizes with ATG8IL under Carbon Starvation**

ATG8 is localized to autophagosomal membranes during autophagy (Kirisako 283  
et al., 1999; Kabeya et al., 2000). An increase in ATG8-labeled puncta is 284  
widely used as a functional readout of autophagic activity in tobacco BY-2 cells 285  
and plants (Hanamata et al., 2013; Bassham, 2015). To further verify the 286  
involvement of autophagy in the relocation of StVPE1-GFP to the vacuole 287  
under carbon starvation, we stably expressed StVPE1-GFP and either 288  
StATG8CL or StATG8IL, both fused to RFP (Dagdas et al., 2016). As 289  
expected, under standard growth conditions, the fluorescence signal of 290  
StATG8IL-RFP was mostly uniformly distributed in the cytoplasm and 291  
autophagosomes were rarely seen, whereas StVPE1-GFP mostly localized to 292  
the ER (Figure 7A). After 72 h of carbon starvation, StATG8IL-RFP had 293

accumulated in autophagosomes in the cytoplasm, and StATG8IL-RFP- 294  
labeled autophagic bodies could be clearly seen in the vacuole following 295  
ConcA treatment (Figures 7B and 7C). Interestingly, colocalization of StVPE1- 296  
GFP with StATG8IL-RFP-labeled puncta was observed in both the cytosol and 297  
the vacuole (Figures 7B and 7C). Quantitative analysis showed that under 298  
carbon starvation,  $23.8 \pm 2.8\%$  and  $47.7 \pm 7.6\%$  of StVPE1-GFP colocalized 299  
with StATG8IL-RFP in the cytoplasm or vacuole, respectively. Interestingly, no 300  
accumulation of StATG8CL-RFP was detected under carbon starvation 301  
(Supplemental Figure 3). StVPE1-GFP colocalization with the autophagosome 302  
marker StATG8IL-RFP supported the hypothesis that during carbon starvation, 303  
VPE1 is relocalized to autophagosomes and transported to the vacuole. 304

### **Silencing of ATG4 Downregulates VPE1 Activity and Reduces Cell Death** 306

The core autophagy protein ATG4 is a cysteine protease that cleaves the C- 308  
terminal part of ATG8 to expose a C-terminal glycine residue, which is then 309  
modified by phosphatidylethanolamine for membrane insertion; it is therefore 310  
essential for autophagosome formation (Kirisako et al., 2000; Yoshimoto et al., 311  
2004). To determine whether the autophagy pathway is necessary for VPE 312  
transport to the vacuole and hence controls VPE activation under sucrose 313  
starvation, we employed RNAi to knock down the expression of *ATG4* (Dagdas 314  
et al., 2018). The expression of ATG4 in *ATG4-RNAi*-transgenic BY-2 cells 315  
was significantly decreased in the first 24 h following carbon starvation (Figure 316  
8A). Interestingly, VPE activity was reduced in parallel to the reduction in 317  
*ATG4* expression (Figure 8B). Staining of carbon-starved BY-2 cells with 318  
Evans blue showed a reduction in cell death in the *ATG4-RNAi* line under 319  
carbon starvation (Figure 8C), giving rise to higher tolerance to carbon 320  
starvation. Our results suggested that VPE-induced cell death is dependent on 321  
the activity of the autophagy pathway. 322

## **DISCUSSION** 324

### **Carbon Starvation Induces VPE Activation** 326

327  
An excess or loss of carbohydrates or their derivatives triggers various 328  
reactions in plants and significantly affects their metabolism, growth, and 329  
development. Moreover, abiotic and biotic stress responses are regulated, at 330  
least in part, by sugars (Smeekens et al., 2010; Keunen et al., 2013). During 331  
storage of potato tubers in the dark, the stored carbohydrates are used, and 332  
their reserves may be greatly diminished in this non-photosynthetic tissue. 333  
Understanding the response to sugar starvation and the adaptive mechanisms 334  
is fundamental. We performed our study in a suspension culture of tobacco 335  
BY-2 cells, instead of using a whole potato plant, since the cultured cells offer 336  
several advantages for autophagic studies, including their accessibility to 337  
inhibitors and small fluorescent molecules and the ability to induce autophagy 338  
by sucrose starvation (Takatsuka et al., 2004). 339  
The VPE-dependent PCD pathway has been shown to be involved not only in 340  
immune responses, but also in responses to a variety of stress inducers 341  
(reviewed by Hatsugai et al., 2015). We have previously shown the 342  
involvement of StVPE1 in PCD induced by cold incubation or chemical stress 343  
under dark conditions (Teper-Bamnlker et al., 2012; Teper-Bamnlker et al., 344  
2017). Here, carbon starvation of BY-2 cells for short periods, 24 h and 48 h, 345  
was shown to induce VPE expression and activity, respectively, accompanied 346  
by gradual PCD of the cell population (Figures 2 and 3). Longer exposure to 347  
carbon starvation, up to 96 h, stabilized VPE expression while its activity 348  
decreased (Figures 3B and 3C). A transient increase in VPE followed by HR- 349  
related PCD has been shown by Hatsugai et al. (2004), suggesting that VPE is 350  
required to initiate the first wave of the cell death process. Silencing VPE led to 351  
a higher survival rate for the cells, supporting VPE's role in the response to 352  
carbon starvation (Figure 2). To the best of our knowledge, this is the first time 353  
that VPE activity has been shown to be associated with cell death as a result 354  
of carbon starvation. Carbon starvation has been associated with growth 355  
delay, accelerated degradation of cellular proteins, and an autophagic 356  
response in sycamore maple (Aubert et al., 1996), tobacco (Moriyasu and 357  
Ohsumi, 1996) and Arabidopsis suspension-cultured cells (Contento et al., 358  
2004; Rose et al., 2006). Carbon starvation in cultures of marine pine (*Pinus* 359

*pinaster* Ait.) was suggested to induce PCD events (Azevedo et al., 2008; 360  
Azevedo et al., 2014). 361

### **Carbon Starvation Induces Autophagic Transport of VPE1 to the Vacuole** 363

VPEs are synthesized as large precursor proteins and are self-catalytically 365  
converted into an active mature form under acidic conditions (Kuroyanagi et 366  
al., 2002; Hara-Nishimura et al., 2005; Hatsugai et al., 2015). This implies that 367  
the VPE precursor is transported to the vacuole where it is converted into its 368  
active mature form (Kinoshita et al., 1999). However, the transport mechanism 369  
is not known. Here we followed StVPE1 relocalization from the ER to cytosolic 370  
vesicles and then to the vacuole under carbon starvation (Figures 4 and 6). 371  
VPE transport to the vacuole did not involve the Golgi (Figure 5), but rather the 372  
autophagy machinery (Figure 6). Both developmental PCD and HR-related 373  
PCD require autophagy and its upstream regulator, the caspase-fold protease 374  
metacaspase (Minina et al., 2014a; Minina et al., 2014b). Metabolic analysis of 375  
autophagy-deficient mutants, as well as their phenotypes, suggests that 376  
autophagy has global effects on the central metabolism in response to carbon 377  
starvation (Avin-Wittenberg et al., 2015). Here, exposure of BY-2 cells to 378  
carbon starvation induced StVPE1-GFP in membrane vesicles that were 379  
eventually relocalized to the vacuole (Figure 6). Colocalization of StVPE1-GFP 380  
with the autophagosome marker StATG8IL-RFP, but not StATG8CL-RFP, and 381  
accumulation of double-labeled bodies in the vacuole following treatment with 382  
the ATPase inhibitor ConcA, suggest the involvement of the autophagy 383  
machinery in VPE transport to the cell vacuole during carbon starvation 384  
(Figures 6 and 7, and Supplemental Figure 2). The involvement of direct ER- 385  
to-vacuole trafficking through the autophagy pathway was reviewed by 386  
Michaeli et al (2014). This route is an important one for vacuole biogenesis, 387  
plant growth and the response to environmental stress, supporting the 388  
existence of a Golgi-independent, direct ER-to-vacuole trafficking route in 389  
plants that uses the autophagy machinery (Michaeli et al., 2014). ER-to- 390  
vacuole relocalization has been demonstrated for Arabidopsis VPE $\gamma$  through 391  
the spindle-shaped ER body, which is considered to be the largest ER-derived 392  
body in plants (Yamada et al., 2011). ER bodies were seen to fuse with the 393

tonoplast following abiotic stress, such as salt treatment, mediating the 394  
delivery of Arabidopsis VPE $\gamma$  to the vacuole (Hayashi et al., 2001). In addition, 395  
accumulation of two cysteine proteases—RD21 and VPE $\gamma$ —on the ER bodies, 396  
have been identified in Arabidopsis seedlings to be involved in cell death 397  
induced by senescence (Rojo et al., 2003). This indicates that cysteine 398  
proteases stored in ER-derived compartments in senescing tissues reach the 399  
vacuole by passing through the Golgi apparatus. However, there is no direct 400  
evidence linking autophagy with ER-body pathways (Reviewed by Michaeli et 401  
al., 2014). Taken together, we show, for the first time, VPE relocalization from 402  
the ER to the vesicles which is not related to the Golgi apparatus, but rather to 403  
autophagosomes. This suggests VPE transportation by the autophagy 404  
pathway following carbon starvation. Though initially defined as a bulk non- 405  
selective process, it has become clear in recent years that multiple selective 406  
autophagy processes target specific cell components for degradation in 407  
response to different environmental or developmental signals (for a recent 408  
review see Avin-Wittenberg et al., 2018). ATG8 plays a key role in the 409  
selective recruitment of autophagic cargo into autophagosomes, either directly 410  
or through cargo receptors that link ATG8 to specific cargo. ATG8 binding is 411  
often mediated by a conserved motif, the ATG8-interacting motif (AIM), also 412  
known as LC3-interacting region (LIR), on the target protein (Michaeli et al., 413  
2016; Birgisdottir et al., 2013). Vegetative type VPEs contain several 414  
evolutionarily well-conserved potential AIMS, as predicted by two available 415  
bioinformatics tools, iLIR and hfAIM (Supplementary data 2; Kalvari et al., 416  
2014). In contrast, no ATG8–ubiquitin-interacting motif has been found 417  
(Marshall et al., 2019), suggesting the intriguing possibility that VPE might be 418  
ATG8 cargo. 419

## **VPE1 Autophagy Induces Cell Death under Carbon Starvation** 421

We found several lines of evidence suggesting the involvement of autophagy 423  
in VPE transport to the vacuole during carbon starvation, leading to cell death: 424  
(i) exposure to starvation resulted in StVPE1-GFP relocalization from the ER to 425  
cytosolic vesicles that are transported to the vacuole (Figures 4 and 6); (ii) an 426  
increase in StVPE1-GFP puncta in the vacuole after ConCA treatment in both 427

StVPE1-GFP- and StVPE1-RFP-transgenic cells (Figure 6 and Supplemental 428  
Figure 2), which were (iii) clearly inhibited in the presence of 3-MA in the 429  
culture media (Figure 6); (iv) StVPE1-GFP colocalized with the autophagy 430  
marker StATG8IL-RFP in BY-2 cells in the cytoplasm and vacuole (Figure 7 431  
and Supplemental Figure 3); (v) downregulation of the core ATG component 432  
*ATG4* reduced BY-2 cell death in response to carbon starvation (Figure 8). 433

In plants, the involvement of autophagy in PCD in response to different 434  
developmental and environmental cues is not well understood, and autophagy 435  
has been shown to have both pro-survival and pro-death activities (Floyd et al., 436  
2015; Üstün et al., 2017). Autophagy is induced upon carbon and nitrogen 437  
limitation, as well as in response to multiple abiotic stresses, and mutants that 438  
are defective in core autophagy genes are hypersensitive to these stresses 439  
(Avin-Wittenberg et al., 2018). Thus, autophagy is usually presumed to play a 440  
pro-survival role under these conditions. However, some evidence suggests 441  
that autophagy may also promote PCD in response to abiotic stress (Barany et 442  
al., 2018). This dual function of autophagy is better characterized in the plant's 443  
innate immune system, where autophagy has been shown to act as either a 444  
survival or cell-death pathway, depending on the type of pathogen (i.e., 445  
biotrophic or necrotrophic) and the type of plant immune receptors involved in 446  
the response (Zhou et al., 2014; Leary et al., 2017; Üstün et al., 2017). Genetic 447  
analysis in *Arabidopsis* and tobacco plants has indicated a critical role for 448  
autophagy in the initiation and promotion of the HR upon infection with 449  
avirulent strains of different pathogens, including *Pseudomonas syringae* pv. 450  
*tomato*, *Tobacco mosaic virus*, and *Hyaloperonospora arabidopsidis* 451  
(Hackenberg et al., 2013; Coll et al., 2014; Han et al., 2015). Accordingly, 452  
several *atg* mutants (e.g., *atg7*, *atg9*) displayed considerable suppression of 453  
HR-associated cell death in *Arabidopsis* (Hofius et al., 2009). Autophagy is 454  
also thought to contribute to developmental PCD, mostly based on microscopic 455  
morphological observations, and has a crucial role in the death of suspensor 456  
cells during normal embryogenesis in Norway spruce (Minina et al., 2013). In 457  
addition, it has been recently suggested that the autophagy pathway might 458  
promote PCD during microspore embryogenesis in barley. After a stress 459  
treatment at 4°C, autophagosome formation was visible in microspores along 460  
with PCD, and treatment with autophagy inhibitors decreased microspore cell 461

death (Bárány et al., 2018). Vacuolar cell death through VPE in BY-2 cells 462  
treated with aluminum has been reported (Kariya et al., 2013; Kariya et al., 463  
2018). Vacuolar cell death accompanied by autophagic activity involving the 464  
formation of lytic lysosome-like structures has also been described in BY-2 465  
cells treated with cadmium or chemicals, and in response to sucrose starvation 466  
(Kutik et al., 2014; Iakimova et al., 2019). Here we show, for the first time to 467  
our knowledge, the involvement of the autophagy pathway in VPE 468  
translocation to the vacuole (Figures 4, 6 and 7, and Supplemental Figure 2), 469  
followed by VPE activation associated with BY-2 cell death (Figure 3). In 470  
agreement with this, silencing of *VPE* and *ATG4* in BY-2 cells decreased VPE 471  
activity and cell death (Figures 2 and 8). VPEs are cysteine proteases that 472  
activate protein precursors functioning in the vacuole (Hatsugai et al., 2006). 473  
VPEs are involved in cell death through destruction of the vacuolar membrane 474  
and the release of hydrolytic enzymes to the cytoplasm (Hatsugai et al., 2006; 475  
Hara-Nishimura and Hatsugai, 2011). Autophagy has been mainly described 476  
as a process that promotes cell survival; here, it is suggested that it can also 477  
promote PCD under carbon starvation. Dissecting the relationship between 478  
autophagy and PCD is complicated by the fact that the vacuole and its 479  
hydrolytic enzymes are needed for the pro-survival homeostasis that maintains 480  
autophagy-mediated recycling of biological macromolecules, as well as for 481  
vacuolar PCD processes (Müntz, 2007). Much remains to be learned about the 482  
relationships between autophagy and VPE translocation and activity. Clearly, a 483  
mechanistic understanding of VPE activity and its substrates in the vacuole, 484  
and its effect on cell viability, is critical to being able to link VPE activity to 485  
autophagy. 486

## METHODS 488

### Plant Material 490

Potato (*Solanum tuberosum* L.) cv. Désirée and transgenic potato plants 492  
expressing StVPE1-GFP (Teper-Bamnlker et al., 2017) were grown on 493  
Nitsch's medium (Nitsch and Nitsch, 1969) supplemented with 2% (w/v) 494  
sucrose and 50 mg mL<sup>-1</sup> kanamycin. Plants were grown under a 16 h light/8 h 495

dark cycle (long day) at 25°C in a growth chamber. For the carbon-starvation 496  
treatment, 10 uniform plants were transferred to dark conditions or to fresh 497  
Nitch's medium without sucrose for 7 days. 498

Tobacco (*Nicotiana tabacum* L.) suspension-cultured cells (BY-2) were 499  
agitated on a rotary shaker at 130 rpm, 26°C, and maintained by weekly 500  
dilution (400 µL culture into 20 mL fresh medium) in modified Linsmaier & 501  
Skoog (LS) medium, as previously reported (Nagata et al., 1992). A sucrose- 502  
free culture medium was prepared by omitting sucrose from the culture 503  
medium. The pH of these culture media was adjusted to 5.8 with 1 M KOH. 504

### **Carbon Starvation and Viability Assay of BY-2 Cells**

 506

Five-day-old BY-2 cells were collected by gravity flow and the pellet was 508  
resuspended in 30 mL sucrose-free LS medium. After three additional washing 509  
steps with 30 mL sucrose-free LS medium, the cells were resuspended in the 510  
same volume of fresh medium and kept at 26°C with rotation at 130 rpm. BY-2 511  
cell viability was determined by incubation for 15 min with 0.012% (w/v) Evans 512  
blue dissolved in water. Unbound dye was removed by extensive washing with 513  
sucrose-free culture medium and percentage cell death was determined using 514  
ImageJ digital imaging software (Abràmoff et al., 2004). 515

### **DNA Fragmentation Assay**

 517

DNA fragmentation was evaluated by TUNEL reaction. The TUNEL method 519  
was used to detect 3'OH termini of nuclear DNA. The procedure was 520  
performed based on the method described by Jones et al. (2001) using the In 521  
Situ Cell Death Detection Kit, Fluorescein (Roche Applied Science), according 522  
to the manufacturer's instructions. 523

To visualize nuclei in BY-2 cells, samples were stained with 4',6- 524  
diamidino-2-phenylindole (DAPI; Sigma) at 1 µg mL<sup>-1</sup> in PBS buffer for 10 min. 525  
DAPI- and TUNEL-positive staining were observed with an IX81/FV500 526  
confocal laser-scanning microscope (Olympus) equipped with a 488-nm argon 527  
ion laser and a 405-nm diode laser. DAPI was excited with the 405-nm diode 528  
laser, and the emission was filtered with a BA 430- to 460-nm filter. TUNEL 529



was excited with 488 nm of light, and the emission was filtered with a BA505IF 530  
filter. The transmitted light images were obtained using Nomarski differential 531  
interference contrast, and three-dimensional images were obtained using the 532  
FluoView 500 software supplied with the confocal laser-scanning microscope. 533

## **VPE Activity**

VPE activity was measured using the method reported by Kuroyanagi et al. 537  
(2002) with some modifications (Teper-Bamnlker et al., 2017). Briefly, BY-2 538  
cells were harvested and immediately frozen in liquid nitrogen. Ground tissue 539  
(500 mg) was homogenized in 1 mL extraction buffer (50 mM sodium acetate 540  
pH 5.5, 50 mM NaCl, 1 mM EDTA, and 100 mM DTT) under ice-cold 541  
conditions for protein extraction. The homogenate was centrifuged at 15,000g 542  
for 15 min at 4°C, and 90 µL of the supernatant was used for the enzyme 543  
assay. Ac-ESEN-MCA (1 µL of 10 mM) dissolved in DMSO (Peptide Institute, 544  
Osaka, Japan) was used as the substrate for the reactions in a final volume of 545  
110 µL (90 µM). The amount of 7-amino-4-methylcoumarin released was 546  
determined spectrophotometrically at an excitation wavelength of 380 nm and 547  
an emission wavelength of 460 nm (Enspire 2003 Multi Label Reader, Perkin- 548  
Elmer) after 2 h of incubation at room temperature. A known amount of 7- 549  
amino-4-methylcoumarin was used for calibration. Protein content was 550  
determined with Pierce™ 660 nm Protein Assay Reagent (Thermo Scientific) 551  
using bovine serum albumin as the standard. 552

## **Construction of Plasmids**

VPE-RNAi and StVPE1-GFP constructs were prepared as previously reported 556  
(Teper-Bamnlker et al., 2017). 557

To determine subcellular localization, a tobacco BY-2 cell line stably 558  
expressing StVPE1-GFP was coexpressed with an ER marker (HDEL), 559  
tonoplast marker (γ-TIP) and Golgi marker (GmMan1) (Nelson et al., 2007), 560  
and with autophagosome markers StATG8IL and StATG8CL (autophagy- 561  
related proteins; a gift from Dr Tolga Bozkurt; Dagdas et al., 2016). 562

For *ATG4* silencing, a hairpin RNAi construct targeting a conserved 563  
region of *ATG4* (Niben101Scf02450g03007.1) was kindly provided by Tolga 564  
Bozkurt from the Department of Life Sciences, Imperial College London, UK 565  
(Dagdaz et al., 2018). 566

## BY-2 Cell Transformation and Selection 567

Transformation of tobacco cell-suspension cultures was performed as 570  
previously reported (Frydman et al., 2004). Briefly, a 4-mL aliquot of a 6-day- 571  
old exponentially growing suspension of BY-2 cells was transferred to a 250- 572  
mL Erlenmeyer flask and incubated for 30 min at 25°C with 40 mL of an 573  
overnight culture of *Agrobacterium tumefaciens* EHA105 harboring the binary 574  
plasmid, and containing 500 µM acetosyringone and 10 mM MgSO<sub>4</sub>. After 2 575  
days of cocultivation, the cells were washed with modified liquid LS containing 576  
250 µg mL<sup>-1</sup> claforan, 50 µg mL<sup>-1</sup> kanamycin, 15 µg mL<sup>-1</sup> hygromycin and 2 µg 577  
mL<sup>-1</sup> Basta herbicide. After 2 weeks, the kanamycin-resistant calli were 578  
collected and transferred to solid medium containing 250 µg mL<sup>-1</sup> claforan and 579  
50 µg mL<sup>-1</sup> kanamycin. Four weeks later, the selected transformants were 580  
transferred to a modified liquid LS medium containing the appropriate 581  
antibiotic. 582

## RNA Extraction 583

RNA extraction was performed as described by Chen et al. (2015) with some 584  
modifications. Briefly, BY-2 cells were harvested and immediately frozen in 585  
liquid nitrogen. Pulverized tissue (0.5 g) was added to 1.5 mL prewarmed 586  
(65°C) extraction buffer (100 mM Tris-HCl pH 8.0, 25 mM EDTA, 2 M NaCl, 587  
3% [w/v] CTAB, 4% [w/v] polyvinylpyrrolidone 40, 3% [w/v] β-mercaptoethanol) 588  
and samples were incubated for 45 min at 65°C. After cooling the samples to 589  
room temperature, 1.5 mL of chloroform:isoamylalcohol (24:1, v/v) was added. 590  
Samples were vortexed, and incubated for 10 min at room temperature, then 591  
centrifuged at 12,000 g for 20 min at 4°C. The upper phase was collected and 592  
the above steps were repeated. RNA was precipitated for 2.5 h at -20°C by the 593  
addition of LiCl at a final concentration of 3 M. Following centrifugation at 594  
595  
596

12,000 g and 4°C for 20 min, the pellet was washed twice with 1.5 mL of 70% ethanol, centrifuged for 10 min, and air-dried at room temperature. Finally, the pellet was resuspended in 50 µL ultrapure water. After extraction, RNA samples were treated with the Turbo DNA-free Kit (Invitrogen, Thermo Fisher Scientific) to remove contaminating DNA according to the manufacturer's protocol. Concentrations of RNA samples were measured with a ND-1000 spectrophotometer (Nanodrop Technologies) and purity was verified by the ratio of optical density at 260 nm and 280 nm (OD<sub>260</sub>:OD<sub>280</sub> between 1.80 and 2.05), and OD<sub>260</sub>:OD<sub>230</sub> (between 2.00 and 2.30). Sample integrity was evaluated by electrophoresis on a 1% agarose gel containing 0.5 µg mL<sup>-1</sup> SafeView Nucleic Acid Stain (NBS Biologicals). Observation of intact 18S and 28S rRNA subunits and absence of smears in the gel indicated minimal RNA degradation.

### **cDNA Synthesis and RT-PCR Analysis**

cDNA was synthesized from 400 ng of total BY-2 RNA using the qPCR BIO cDNA Kit (PCR Biosystems) according to the manufacturer's specifications. RT-PCR primers, synthesized by Hylabs (Rehovot, Israel), were designed using Primer Express 2.0 (Applied Biosystems, Foster City, CA). For the exogenous *StVPE1* and endogenous homologous VPE genes *NtVPE2*, *NtVPE3*, *NtVPE1a*, *NtVPE1b* (VPE vegetative type), the primers were: F 5'-GGGTACCGATCCTGCAAATG-3' and R 5'-TGCATCACGCTGGTTGACA-3'.

For *ATG4*, the primers were: F 5'-CACAGTCAGCCGCATGACC-3' and R 5'-GACCATATGTCTTCCCGGCTTG-3'. For *Actin9*, used as the housekeeping gene, primers were: F 5'-CTATTCTCCGCTTTGGACTTGGCA-3' and R 5'-AGGACCTCAGGACAACGGAAACG-3' (GenBank accession no. X69885), as previously described (Kariya et al., 2018). Quantitative real-time RT-PCR was performed in a total volume of 10 µL including 5 µL fast SYBR<sup>TM</sup> Green Master Mix (Applied Biosystems). The following program: 95°C for 20 min, 40 cycles of 95°C for 3 s and 60°C for 30 s was run in a StepOne Real-Time PCR machine (Applied Biosystems). The quality of the graphs, melting curves and quantitative analyses of the data were performed using StepOne software Version 2.2.2 (Applied Biosystems).

|                                                                                                                                                                                                                                                                                                                                                                                                                                                                                                                                                                                                                                                     |                                                             |
|-----------------------------------------------------------------------------------------------------------------------------------------------------------------------------------------------------------------------------------------------------------------------------------------------------------------------------------------------------------------------------------------------------------------------------------------------------------------------------------------------------------------------------------------------------------------------------------------------------------------------------------------------------|-------------------------------------------------------------|
|                                                                                                                                                                                                                                                                                                                                                                                                                                                                                                                                                                                                                                                     | 631                                                         |
| <b>Potato Plant Transformation and Transgenic Selection</b>                                                                                                                                                                                                                                                                                                                                                                                                                                                                                                                                                                                         | 632                                                         |
|                                                                                                                                                                                                                                                                                                                                                                                                                                                                                                                                                                                                                                                     | 633                                                         |
| Potato leaves (cv. Désirée) were used for <i>Agrobacterium</i> -mediated leaf-disc infection as described previously (Horsch et al., 1985; Rocha-Sosa et al., 1989). Transgenic plants were selected on 25 mg L <sup>-1</sup> kanamycin (Duchefa). For transgenic plant validation, DNA extraction from potato leaves and PCR were performed as described previously (Teper-Bamnlker et al., 2012) using primers VPE-F 5'-TGGTCAAAGAGAGAACTGCCAG-3' and GFP-R 5'-GATGTTGTGGCGGATCTT-3', amplifying a PCR fragment of 908 bp.                                                                                                                        | 634<br>635<br>636<br>637<br>638<br>639<br>640               |
|                                                                                                                                                                                                                                                                                                                                                                                                                                                                                                                                                                                                                                                     | 641                                                         |
| <b>Live-Cell Imaging by Confocal Laser-Scanning Microscopy</b>                                                                                                                                                                                                                                                                                                                                                                                                                                                                                                                                                                                      | 642                                                         |
|                                                                                                                                                                                                                                                                                                                                                                                                                                                                                                                                                                                                                                                     | 643                                                         |
| A Leica SP8/LAS X confocal laser-scanning microscope was used to observe fluorescently labeled cells and leaves. GFP and RFP were excited at 488 and 561 nm with an argon laser and visualized at 495–550 nm and 570–620 nm, respectively. Pearson's correlation coefficient was calculated by selecting a region of interest in 15 repeats. Analyzed images had the same acquisition parameters and chosen thresholds. Image series (Z-stacks) and colocalization analysis between StVPE1-GFP and ATG8IL-RFP were performed using Bitplane Imaris software version 8.0.1 (Bitplane A.G.). Three biological replicates were performed per genotype. | 644<br>645<br>646<br>647<br>648<br>649<br>650<br>651<br>652 |
|                                                                                                                                                                                                                                                                                                                                                                                                                                                                                                                                                                                                                                                     | 653                                                         |
| <b>Treatment of BY-2 Cells with Autophagy Inhibitors</b>                                                                                                                                                                                                                                                                                                                                                                                                                                                                                                                                                                                            | 654                                                         |
|                                                                                                                                                                                                                                                                                                                                                                                                                                                                                                                                                                                                                                                     | 655                                                         |
| A 500- $\mu$ L aliquot of 5-day-old tobacco culture was transferred to a sterile 48-well petri dish supplemented with a final concentration of 1 $\mu$ M ConcA (Sigma). ConcA was prepared as a 100 $\mu$ M stock solution in DMSO. As a control, DMSO was added to the tobacco culture at the same final volume. 3-MA (Sigma) was added to BY-2 cells at a final concentration of 5 mM. 3-MA was solubilized in BY-2 medium without sugar, under gentle heating (45°C), as a stock of 100 mM. The cells supplemented with the inhibitors were cultured at 26°C with rotation of 130 rpm for 48 h until GFP or RFP analysis.                        | 656<br>657<br>658<br>659<br>660<br>661<br>662<br>663        |
|                                                                                                                                                                                                                                                                                                                                                                                                                                                                                                                                                                                                                                                     | 664                                                         |

|                                                                                                                                                                                                                                                                                                                                  |                                        |
|----------------------------------------------------------------------------------------------------------------------------------------------------------------------------------------------------------------------------------------------------------------------------------------------------------------------------------|----------------------------------------|
| <b>Statistical Analysis</b>                                                                                                                                                                                                                                                                                                      | 665                                    |
|                                                                                                                                                                                                                                                                                                                                  | 666                                    |
| Statistical analysis of the data was performed with JMP-in software (version 3 for Windows; SAS Institute), using a t-test, or by two-way analysis of variance (ANOVA) followed by Tukey–Kramer HSD test. Statistical significance was set at $P < 0.05$ . Values were expressed as mean $\pm$ standard error of the mean (SEM). | 667<br>668<br>669<br>670<br>671<br>672 |
| <b>Supplemental Data</b>                                                                                                                                                                                                                                                                                                         | 673                                    |
|                                                                                                                                                                                                                                                                                                                                  | 674                                    |
| <b>Supplemental Figure 1.</b> StVPE1-GFP forms punctate structures while the ER stays intact, suggesting that the cell is still viable.                                                                                                                                                                                          | 675<br>676                             |
| <b>Supplemental Figure 2.</b> Concanamycin A (ConcA) inhibits StVPE1-RFP degradation in the vacuole.                                                                                                                                                                                                                             | 677<br>678                             |
| <b>Supplemental Figure 3.</b> RFP-ATG8CL puncta are not induced during carbon starvation.                                                                                                                                                                                                                                        | 679<br>680                             |
| <b>Supplemental Data Set 1.</b> Multiple protein sequence alignment of StVPE1 and VPE-vegetative type from <i>Nicotiana tabacum</i> (Nt), and alignment of the 500-bp sequence of <i>StVPE1</i> that was used to produce <i>VPE-RNAi</i> lines with VPE homologs from Nt.                                                        | 681<br>682<br>683<br>684               |
| <b>Supplemental Data Set 2.</b> Predicted VPE–ATG8-interacting motifs.                                                                                                                                                                                                                                                           | 685<br>686                             |
| <b>ACKNOWLEDGMENTS</b>                                                                                                                                                                                                                                                                                                           | 687<br>688                             |
| The authors thank Professor Robert Fluhr, from the Department of Plant Sciences, Weizmann Institute of Science, for his valuable suggestions and constructive criticism.                                                                                                                                                         | 689<br>690<br>691<br>692               |
| <b>AUTHOR CONTRIBUTIONS</b>                                                                                                                                                                                                                                                                                                      | 693                                    |
| P.T-B and D.E. conceived the project and designed the experiments. P.T-B, R.D., E.B., M.A-A, performed the experiments. P.T-B, H.P-Z., T.A-W, E.S. and DE analyzed the data. P.T-B and D.E. wrote the article.                                                                                                                   | 694<br>695<br>696<br>697               |
| <b>REFERENCES</b>                                                                                                                                                                                                                                                                                                                | 698                                    |

- 699
- Abràmoff, M.D., Magalhães, P.J., and Ram, S.J.** (2004). Image processing with ImageJ. *Biophotonics International* **11**: 36-43. 700  
701
- Aubert, S., Gout, E., Bligny, R., Marty-Mazars, D., Barrieu, F., Alabouvette, J., Marty, F., and Douce, R.** (1996). Ultrastructural and biochemical characterization of autophagy in higher plant cells subjected to carbon deprivation: control by the supply of mitochondria with respiratory substrates. *Journal of Cell Biology* **133**: 1251-1263. 702  
703  
704  
705  
706
- Avin-Wittenberg, T., Bajdzienko, K., Wittenberg, G., Alseekh, S., Tohge, T., Bock, R., Giavalisco, P., and Fernie, A.R.** (2015). Global analysis of the role of autophagy in cellular metabolism and energy homeostasis in *Arabidopsis* seedlings under carbon starvation. *The Plant Cell* **27**: 306-322. 707  
708  
709  
710  
711
- Avin-Wittenberg, T., Baluška, F., Bozhkov, P.V., Elander, P.H., Fernie, A.R., Galili, G., Hassan, A., Hofius, D., Isono, E., and Le Bars, R.** (2018). Autophagy-related approaches for improving nutrient use efficiency and crop yield protection. *Journal of experimental botany* **69**: 1335-1353. 712  
713  
714  
715
- Azevedo, H., Dias, A., and Tavares, R.M.** (2008). Establishment and characterization of *Pinus pinaster* suspension cell cultures. *Plant Cell, Tissue and Organ Culture* **93**: 115-121. 716  
717  
718
- Azevedo, H., Castro, P.H., Gonçalves, J.F., Lino-Neto, T., and Tavares, R.M.** (2014). Impact of carbon and phosphate starvation on growth and programmed cell death of maritime pine suspension cells. *In Vitro Cellular & Developmental Biology-Plant* **50**: 478-486. 719  
720  
721  
722
- Bárány, I., Berenguer, E., Solís, M.-T., Pérez-Pérez, Y., Santamaría, M.E., Crespo, J.L., Risueño, M.C., Díaz, I., and Testillano, P.S.** (2018). Autophagy is activated and involved in cell death with participation of cathepsins during stress-induced microspore embryogenesis in barley. *Journal of Experimental Botany* **69**: 1387-1402. 723  
724  
725  
726  
727
- Bassham, D.C.** (2015). Methods for analysis of autophagy in plants. *Methods* **75**: 181-188. 728  
729
- Belenghi, B., Salomon, M., and Levine, A.** (2004). Caspase-like activity in the seedlings of *Pisum sativum* eliminates weaker shoots during early 730  
731

|                                                                                                                                                                                                                                                                                                                                              |                                 |
|----------------------------------------------------------------------------------------------------------------------------------------------------------------------------------------------------------------------------------------------------------------------------------------------------------------------------------------------|---------------------------------|
| vegetative development by induction of cell death. <i>Journal of Experimental Botany</i> <b>55</b> : 889-897.                                                                                                                                                                                                                                | 732<br>733                      |
| <b>Bonneau, L., Ge, Y., Drury, G.E., and Gallois, P.</b> (2008). What happened to plant caspases? <i>Journal of Experimental Botany</i> <b>59</b> : 491–499.                                                                                                                                                                                 | 734<br>735                      |
| <b>Cai, Y.-m., and Gallois, P.</b> (2015). Programmed Cell Death Regulation by Plant Proteases with Caspase-Like Activity. In <i>Plant Programmed Cell Death</i> (Springer), pp. 191-202.                                                                                                                                                    | 736<br>737<br>738               |
| <b>Chen, L., Guo, Y., Bai, G., Sun, J., and Li, Y.</b> (2015). Effect of 5-aminolevulinic acid and genistein on accumulation of polyphenol and anthocyanin in 'Qinyang' apples. <i>Journal of Animal and Plant Science</i> <b>25</b> : 68-79.                                                                                                | 739<br>740<br>741<br>742        |
| <b>Coll, N., Smidler, A., Puigvert, M., Popa, C., Valls, M., and Dangl, J.</b> (2014). The plant metacaspase AtMC1 in pathogen-triggered programmed cell death and aging: functional linkage with autophagy. <i>Cell Death and Differentiation</i> <b>21</b> : 1399.                                                                         | 743<br>744<br>745<br>746        |
| <b>Contento, A.L., Kim, S.-J., and Bassham, D.C.</b> (2004). Transcriptome profiling of the response of <i>Arabidopsis</i> suspension culture cells to Suc starvation. <i>Plant Physiology</i> <b>135</b> : 2330-2347.                                                                                                                       | 747<br>748<br>749               |
| <b>Crawford, E.D., and Wells, J.A.</b> (2011). Caspase substrates and cellular remodeling. <i>Annual Review of Biochemistry</i> <b>80</b> : 1055-1087.                                                                                                                                                                                       | 750<br>751                      |
| <b>Dagdas, Y.F., Belhaj, K., Maqbool, A., Chaparro-Garcia, A., Pandey, P., Petre, B., Tabassum, N., Cruz-Mireles, N., Hughes, R.K., and Sklenar, J.</b> (2016). An effector of the Irish potato famine pathogen antagonizes a host autophagy cargo receptor. <i>Elife</i> <b>5</b> : e10856.                                                 | 752<br>753<br>754<br>755        |
| <b>Dagdas, Y.F., Pandey, P., Tumtas, Y., Sanguankiattichai, N., Belhaj, K., Duggan, C., Leary, A.Y., Segretin, M.E., Contreras, M.P., and Savage, Z.</b> (2018). Host autophagy machinery is diverted to the pathogen interface to mediate focal defense responses against the Irish potato famine pathogen. <i>Elife</i> <b>7</b> : e37476. | 756<br>757<br>758<br>759<br>760 |
| <b>Del Río, L.A.</b> (2015). ROS and RNS in plant physiology: an overview. <i>Journal of Experimental Botany</i> <b>66</b> : 2827-2837.                                                                                                                                                                                                      | 761<br>762                      |
| <b>Devillard, C., and Walter, C.</b> (2014). Formation of plant tracheary elements in vitro—a review. <i>New Zealand J Forestry Sci</i> <b>44</b> : 22.                                                                                                                                                                                      | 763<br>764                      |

- Escamez, S., and Tuominen, H.** (2014). Programmes of cell death and autolysis in tracheary elements: when a suicidal cell arranges its own corpse removal. *Journal of Experimental Botany*: eru057.
- Floyd, B.E., Pu, Y., Soto-Burgos, J., and Bassham, D.C.** (2015). To Live or Die: Autophagy in Plants. In *Plant Programmed Cell Death* (Springer), pp. 269-300.
- Frydman, A., Weisshaus, O., Bar-Peled, M., Huhman, D.V., Sumner, L.W., Marin, F.R., Lewinsohn, E., Fluhr, R., Gressel, J., and Eyal, Y.** (2004). Citrus fruit bitter flavors: isolation and functional characterization of the gene Cm1, 2RhaT encoding a 1, 2 rhamnosyltransferase, a key enzyme in the biosynthesis of the bitter flavonoids of citrus. *The Plant Journal* **40**: 88-100.
- Galluzzi, L., Baehrecke, E.H., Ballabio, A., Boya, P., Bravo-San Pedro, J.M., Cecconi, F., Choi, A.M., Chu, C.T., Codogno, P., and Colombo, M.I.** (2017). Molecular definitions of autophagy and related processes. *The EMBO journal* **36**: 1811-1836.
- Hackenberg, T., Juul, T., Auzina, A., Gwiżdż, S., Małolepszy, A., Van Der Kelen, K., Dam, S., Bressendorff, S., Lorentzen, A., and Roepstorff, P.** (2013). Catalase and NO CATALASE ACTIVITY1 promote autophagy-dependent cell death in Arabidopsis. *The Plant Cell* **25**: 4616-4626.
- Han, S., Wang, Y., Zheng, X., Jia, Q., Zhao, J., Bai, F., Hong, Y., and Liu, Y.** (2015). Cytoplasmic glyceraldehyde-3-phosphate dehydrogenases interact with ATG3 to negatively regulate autophagy and immunity in *Nicotiana benthamiana*. *The Plant Cell* **27**: 1316-1331.
- Hanamata, S., Kurusu, T., Okada, M., Suda, A., Kawamura, K., Tsukada, E., and Kuchitsu, K.** (2013). In vivo imaging and quantitative monitoring of autophagic flux in tobacco BY-2 cells. *Plant Signaling & Behavior* **8**.
- Hara-Nishimura, I., and Hatsugai, N.** (2011). The role of vacuole in plant cell death. *Cell Death Differentiation* **18**: 1298-1304.
- Hara-Nishimura, I., Inoue, K., and Nishimura, M.** (1991). A unique vacuolar processing enzyme responsible for conversion of several proprotein precursors into the mature forms. *FEBS letters* **294**: 89-93.



- Hara-Nishimura, I., Takeuchi, Y., and Nishimura, M.** (1993). Molecular characterization of a vacuolar processing enzyme related to a putative cysteine proteinase of *Schistosoma mansoni*. *The Plant Cell* **5**: 1651-1659.
- Hara-Nishimura, I., Hatsugai, N., Nakaune, S., Kuroyanagi, M., and Nishimura, M.** (2005). Vacuolar processing enzyme: an executor of plant cell death. *Current Opinion in Plant Biology* **8**: 404-408.
- Hatsugai, N., Kuroyanagi, M., Nishimura, M., and Hara-Nishimura, I.** (2006). A cellular suicide strategy of plants: vacuole-mediated cell death. *Apoptosis* **11**: 905–911.
- Hatsugai, N., Yamada, K., Goto-Yamada, S., and Hara-Nishimura, I.** (2015). Vacuolar processing enzyme in plant programmed cell death. *Frontiers in Plant Science* **6**: 234.
- Hatsugai, N., Kuroyanagi, M., Yamada, K., Meshi, T., Tsuda, S., Kondo, M., Nishimura, M., and Hara-Nishimura, I.** (2004). A plant vacuolar protease, VPE, mediates virus-induced hypersensitive cell death. *Science* **305**: 855–858.
- Hayashi, Y., Yamada, K., Shimada, T., Matsushima, R., Nishizawa, N., Nishimura, M., and Hara-Nishimura, I.** (2001). A proteinase-storing body that prepares for cell death or stresses in the epidermal cells of *Arabidopsis*. *Plant and Cell Physiology* **42**: 894-899.
- He, C., and Klionsky, D.J.** (2009). Regulation mechanisms and signaling pathways of autophagy. *Annual Review Genetics* **43**: 67.
- Hofius, D., Schultz-Larsen, T., Joensen, J., Tsitsigiannis, D.I., Petersen, N.H., Mattsson, O., Jørgensen, L.B., Jones, J.D., Mundy, J., and Petersen, M.** (2009). Autophagic components contribute to hypersensitive cell death in *Arabidopsis*. *Cell* **137**: 773-783.
- Horsch, R., Rogers, S., and Fraley, R.** (1985). Transgenic plants. In *Cold Spring Harbor symposia on quantitative biology* (Cold Spring Harbor Laboratory Press), pp. 433-437.
- Iakimova, E.T., and Woltering, E.J.** (2017). Xylogenesis in zinnia (*Zinnia elegans*) cell cultures: unravelling the regulatory steps in a complex developmental programmed cell death event. *Planta* **245**: 681-705.
- Iakimova, E.T., Yordanova, Z.P., Cristescu, S.M., Harren, F.J., and Woltering, E.J.** (2019). Cell death signaling and morphology in chemical-

- treated tobacco BY-2 suspension cultured cells. *Environmental and Experimental Botany* **164**: 157-169. 831  
832
- Jones, A.M., Coimbra, S., Fath, A., Sottomayor, M., and Thomas, H.** 833  
(2001). Programmed cell death assays for plants. *Methods in Cell Biology* 834  
**66**: 437-451. 835
- Kabbage, M., Kessens, R., Bartholomay, L.C., and Williams, B.** (2017). 836  
The Life and Death of a Plant Cell. *Annual Review of Plant Biology* **68**. 837
- Kabeya, Y., Mizushima, N., Ueno, T., Yamamoto, A., Kirisako, T., Noda, 838  
T., Kominami, E., Ohsumi, Y., and Yoshimori, T.** (2000). LC3, a 839  
mammalian homologue of yeast Apg8p, is localized in autophagosome 840  
membranes after processing. *EMBO Journal* **19**: 5720-5728. 841
- Kalvari, I., Tsompanis, S., Mulakkal, N.C., Osgood, R., Johansen, T., 842  
Nezis, I.P., and Promponas, V.J.** (2014). iLIR: A web resource for 843  
prediction of Atg8-family interacting proteins. *Autophagy* **10**: 913-925. 844
- Kariya, K., Tsuchiya, Y., Sasaki, T., and Yamamoto, Y.** (2018). Aluminium- 845  
induced cell death requires upregulation of NtVPE1 gene coding vacuolar 846  
processing enzyme in tobacco (*Nicotiana tabacum* L.). *Journal of Inorganic 847  
Biochemistry* **181**: 152-161. 848
- Kariya, K., Demiral, T., Sasaki, T., Tsuchiya, Y., Turkan, I., Sano, T., 849  
Hasezawa, S., and Yamamoto, Y.** (2013). A novel mechanism of 850  
aluminium-induced cell death involving vacuolar processing enzyme and 851  
vacuolar collapse in tobacco cell line BY-2. *Journal of Inorganic 852  
Biochemistry* **128**: 196-201. 853
- Kellner, R., De la Concepcion, J.C., Maqbool, A., Kamoun, S., and 854  
Dagdas, Y.F.** (2017). ATG8 expansion: a driver of selective autophagy 855  
diversification? *Trends in plant science* **22**: 204-214. 856
- Keunen, E., Peshev, D., Vangronsveld, J., Van Den Ende, W., and 857  
Cuypers, A.** (2013). Plant sugars are crucial players in the oxidative 858  
challenge during abiotic stress: extending the traditional concept. *Plant, 859  
Cell & Environment* **36**: 1242-1255. 860
- Kinoshita, T., Yamada, K., Hiraiwa, N., Kondo, M., Nishimura, M., and 861  
Hara-Nishimura, I.** (1999). Vacuolar processing enzyme is up-regulated in 862  
the lytic vacuoles of vegetative tissues during senescence and under 863  
various stressed conditions. *Plant Journal* **19**: 43-53. 864

- Kirisako, T., Baba, M., Ishihara, N., Miyazawa, K., Ohsumi, M., Yoshimori, T., Noda, T., and Ohsumi, Y.** (1999). Formation process of autophagosome is traced with Apg8/Aut7p in yeast. *Journal of Cell Biology* **147**: 435-446.
- Kirisako, T., Ichimura, Y., Okada, H., Kabeya, Y., Mizushima, N., Yoshimori, T., Ohsumi, M., Takao, T., Noda, T., and Ohsumi, Y.** (2000). The reversible modification regulates the membrane-binding state of Apg8/Aut7 essential for autophagy and the cytoplasm to vacuole targeting pathway. *Journal of Cell Biology* **151**: 263-276.
- Klionsky, D.J., Abdelmohsen, K., Abe, A., Abedin, M.J., Abeliovich, H., Acevedo Arozena, A., Adachi, H., Adams, C.M., Adams, P.D., and Adeli, K.** (2016). Guidelines for the use and interpretation of assays for monitoring autophagy. *Autophagy* **12**: 1-222.
- Kroemer, G., Galluzzi, L., Vandenabeele, P., Abrams, J., Alnemri, E.S., Baehrecke, E., Blagosklonny, M., El-Deiry, W., Golstein, P., and Green, D.** (2008). Classification of cell death: recommendations of the Nomenclature Committee on Cell Death 2009. *Cell Death & Differentiation* **16**: 3-11.
- Kuroyanagi, M., Nishimura, M., and Hara-Nishimura, I.** (2002). Activation of Arabidopsis vacuolar processing enzyme by self-catalytic removal of an auto-inhibitory domain of the C-terminal propeptide. *Plant Cell Physiol* **43**: 143–151.
- Kuroyanagi, M., Yamada, K., Hatsugai, N., Kondo, M., Nishimura, M., and Hara-Nishimura, I.** (2005). Vacuolar processing enzyme is essential for mycotoxin-induced cell death in *Arabidopsis thaliana*. *Journal of Biological Chemistry* **280**: 32914–32920.
- Kutik, J., Kuthanova, A., Smertenko, A., Fischer, L., and Opatrny, Z.** (2014). Cadmium-induced cell death in BY-2 cell culture starts with vacuolization of cytoplasm and terminates with necrosis. *Physiologia Plantarum* **151**: 423-433.
- Leary, A.Y., Sanguankiatichai, N., Duggan, C., Tumtas, Y., Pandey, P., Segretin, M.E., Salguero Linares, J., Savage, Z.D., Yow, R.J., and Bozkurt, T.O.** (2017). Modulation of plant autophagy during pathogen attack. *Journal of experimental botany* **69**: 1325-1333.

- Marshall, R.S., and Vierstra, R.D.** (2018). Autophagy: the master of bulk and selective recycling. *Annual Review of Plant Biology* **69**: 173-208.
- Marshall, R.S., Hua, Z., Mali, S., McLoughlin, F., and Vierstra, R.D.** (2019). ATG8-binding UIM proteins define a new class of autophagy adaptors and receptors. *Cell* **177**: 766-781. e724.
- Miao, E.A., Rajan, J.V., and Aderem, A.** (2011). Caspase-1-induced pyroptotic cell death. *Immunological reviews* **243**: 206-214.
- Michaeli, S., Avin-Wittenberg, T., and Galili, G.** (2014). Involvement of autophagy in the direct ER to vacuole protein trafficking route in plants. *Frontiers in Plant Science* **5**: 134.
- Minina, E.A., Bozhkov, P.V., and Hofius, D.** (2014a). Autophagy as initiator or executioner of cell death. *Trends in Plant Science*.
- Minina, E.A., Smertenko, A.P., and Bozhkov, P.V.** (2014b). Vacuolar cell death in plants. *Autophagy* **10**: 1-2.
- Minina, E.A., Filonova, L.H., Fukada, K., Savenkov, E.I., Gogvadze, V., Clapham, D., Sanchez-Vera, V., Suarez, M.F., Zhivotovsky, B., and Daniel, G.** (2013). Autophagy and metacaspase determine the mode of cell death in plants. *J Cell Biol* **203**: 917-927.
- Moriyasu, Y., and Ohsumi, Y.** (1996). Autophagy in tobacco suspension-cultured cells in response to sucrose starvation. *Plant Physiology* **111**: 1233-1241.
- Müntz, K.** (2007). Protein dynamics and proteolysis in plant vacuoles. *Journal of Experimental Botany* **58**: 2391-2407.
- Nagata, T., Nemoto, Y., and Hasezawa, S.** (1992). Tobacco BY-2 cell line as the “HeLa” cell in the cell biology of higher plants. *International Review of Cytology* **132**: 1-30.
- Nelson, B.K., Cai, X., and Nebenführ, A.** (2007). A multicolored set of in vivo organelle markers for co-localization studies in Arabidopsis and other plants. *Plant Journal* **51**: 1126-1136.
- Nitsch, J., and Nitsch, C.** (1969). Haploid plants from pollen grains. *Science* **163**: 85-87.
- Pak, C., and Van Doorn, W.G.** (2005). Delay of Iris flower senescence by protease inhibitors. *New Phytologist* **165**: 473-480.

- Petrov, V., Hille, J., Mueller-Roeber, B., and Gechev, T.S.** (2015). ROS-mediated abiotic stress-induced programmed cell death in plants. *Frontiers in Plant Science* **6**. 932-934
- Rocha-Sosa, M., Sonnewald, U., Frommer, W., Stratmann, M., Schell, J., and Willmitzer, L.** (1989). Both developmental and metabolic signals activate the promoter of a class I patatin gene. *EMBO Journal* **8**: 23-29. 935-937
- Rojo, E., Zouhar, J., Carter, C., Kovaleva, V., and Raikhel, N.V.** (2003). A unique mechanism for protein processing and degradation in *Arabidopsis thaliana*. *Proceedings of the National Academy of Sciences* **100**: 7389-7394. 938-941
- Rojo, E., Martín, R., Carter, C., Zouhar, J., Pan, S., Plotnikova, J., Jin, H., Paneque, M., Sánchez-Serrano, J.J., Baker, B., Frederick, M.A., and Natasha, V.R.** (2004). VPE $\gamma$  exhibits a caspase-like activity that contributes to defense against pathogens. *Current Biology* **14**: 1897-1906. 942-945
- Rose, T.L., Bonneau, L., Der, C., Marty-Mazars, D., and Marty, F.** (2006). Starvation-induced expression of autophagy-related genes in *Arabidopsis*. *Biology of The Cell* **98**: 53-67. 946-948
- Schaller, A., Stintzi, A., Rivas, S., Serrano, I., Chichkova, N.V., Vartapetian, A.B., Martínez, D., Guiamét, J.J., Sueldo, D.J., and Van Der Hoorn, R.A.** (2018). From structure to function—a family portrait of plant subtilases. *New Phytologist* **218**: 901-915. 949-952
- Shimada, T., Takagi, J., Ichino, T., Shirakawa, M., and Hara-Nishimura, I.** (2018). Plant vacuoles. *Annual review of plant biology* **69**: 123-145. 953-954
- Silva, R.D., Sotoca, R., Johansson, B., Ludovico, P., Sansonetty, F., Silva, M.T., Peinado, J.M., and Côte Real, M.** (2005). Hyperosmotic stress induces metacaspase and mitochondria dependent apoptosis in *Saccharomyces cerevisiae*. *Molecular Microbiology* **58**: 824-834. 955-958
- Smeekens, S., Ma, J., Hanson, J., and Rolland, F.** (2010). Sugar signals and molecular networks controlling plant growth. *Current Opinion in Plant Biology* **13**: 273-278. 959-961
- Sueldo, D.J., and van der Hoorn, R.A.** (2017). Plant life needs cell death, but does plant cell death need Cys proteases? *The FEBS Journal* **284**: 1577-1585. 962-964

- Suzuki, N., Koussevitzky, S., Mittler, R., and Miller, G.** (2012). ROS and redox signalling in the response of plants to abiotic stress. *Plant, Cell & Environment* **35**: 259-270.
- Takatsuka, C., Inoue, Y., Matsuoka, K., and Moriyasu, Y.** (2004). 3-Methyladenine inhibits autophagy in tobacco culture cells under sucrose starvation conditions. *Plant Cell Physiol* **45**: 265-274.
- Tamura, K., Shimada, T., Ono, E., Tanaka, Y., Nagatani, A., Higashi, S.i., Watanabe, M., Nishimura, M., and Hara-Nishimura, I.** (2003). Why green fluorescent fusion proteins have not been observed in the vacuoles of higher plants. *Plant Journal* **35**: 545-555.
- Tamura, T., Kioi, Y., Miki, T., Tsukiji, S., and Hamachi, I.** (2013). Fluorophore labeling of native FKBP12 by ligand-directed tosyl chemistry allows detection of its molecular interactions in vitro and in living cells. *Journal of American Chemistry Society* **135**: 6782-6785.
- Teper-Bamnolker, P., Buskila, Y., Lopesco, Y., Ben-Dor, S., Saad, I., Holdengreber, V., Belausov, E.d., Zemach, H., Ori, N., Lers, A., and Eshel, D.** (2012). Release of apical dominance in potato tuber is accompanied by programmed cell death in the apical bud meristem. *Plant Physiology* **158**: 2053-2067.
- Teper-Bamnolker, P., Buskila, Y., Belausov, E., Wolf, D., Doron-Faigenboim, A., Ben-Dor, S., Van der Hoorn, R.A., Lers, A., and Eshel, D.** (2017). Vacuolar processing enzyme (VPE) activates programmed cell death in the apical meristem inducing loss of apical dominance. *Plant, Cell & Environment* **40**: 2381-2392.
- Thompson, A.R., Doelling, J.H., Suttangkakul, A., and Vierstra, R.D.** (2005). Autophagic nutrient recycling in Arabidopsis directed by the ATG8 and ATG12 conjugation pathways. *Plant Physiology* **138**: 2097-2110.
- Tsukada, M., and Ohsumi, Y.** (1993). Isolation and characterization of autophagy-defective mutants of *Saccharomyces cerevisiae*. *FEBS letters* **333**: 169-174.
- Üstün, S., Hafren, A., and Hofius, D.** (2017). Autophagy as a mediator of life and death in plants. *Current Opinion in Plant Biology* **40**: 122-130.

- Vacca, R.A., Valenti, D., Bobba, A., Merafina, R.S., Passarella, S., and Marra, E.** (2006). Cytochrome c is released in a reactive oxygen species-dependent manner and is degraded via caspase-like proteases in tobacco Bright-Yellow 2 cells en route to heat shock-induced cell death. *Plant Physiology* **141**: 208-219.
- van Doorn, W.G., Beers, E.P., Dangl, J.L., Franklin-Tong, V.E., Gallois, P., Hara-Nishimura, I., Jones, A.M., Kawai-Yamada, M., Lam, E., Mundy, J., Mur, L.A.J., Petersen, M., Smertenko, A., Taliansky, M., Van Breusegem, F., Wolpert, T., Woltering, E., Zhivotovsky, B., and Bozhkov, P.V.** (2011). Morphological classification of plant cell deaths. *Cell Death Differentiation* **18**: 1241–1246.
- Van Durme, M., and Nowack, M.K.** (2016). Mechanisms of developmentally controlled cell death in plants. *Current Opinion in Plant Biology* **29**: 29-37.
- Vercammen, D., Van De Cotte, B., De Jaeger, G., Eeckhout, D., Casteels, P., Vandepoele, K., Vandenberghe, I., Van Beeumen, J., Inzé, D., and Van Breusegem, F.** (2004). Type II metacaspases Atmc4 and Atmc9 of *Arabidopsis thaliana* cleave substrates after arginine and lysine. *Journal of Biological Chemistry* **279**: 45329–45336.
- Vorster, B.J., Cullis, C., and Kunert, K.** (2019). Plant Vacuolar Processing Enzymes. *Frontiers in Plant Science* **10**: 479.
- Wang, P., Mugume, Y., and Bassham, D.C.** (2018). New advances in autophagy in plants: regulation, selectivity and function. In *Seminars in cell & developmental biology* (Elsevier), pp. 113-122.
- Watanabe, N., and Lam, E.** (2004). Recent advance in the study of caspase-like proteases and Bax inhibitor-1 in plants: their possible roles as regulator of programmed cell death. *Molecular Plant Pathology* **5**: 65–70.
- White, K., Arama, E., and Hardwick, J.M.** (2017). Controlling caspase activity in life and death. *PLoS genetics* **13**: e1006545.
- Woltering, E.J., van der Bent, A., and Hoeberichts, F.A.** (2002). Do plant caspases exist? *Plant Physiology* **130**: 1764–1769.
- Xiong, Y., Contento, A.L., Nguyen, P.Q., and Bassham, D.C.** (2007). Degradation of oxidized proteins by autophagy during oxidative stress in *Arabidopsis*. *Plant Physiology* **143**: 291-299.

- Yamada, K., Nishimura, M., and Hara-Nishimura, I.** (2004). The slow wound-response of  $\gamma$ VPE is regulated by endogenous salicylic acid in *Arabidopsis*. *Planta* **218**: 599-605.
- Yamada, K., Hara-Nishimura, I., and Nishimura, M.** (2011). Unique defense strategy by the endoplasmic reticulum body in plants. *Plant and Cell Physiology* **52**: 2039-2049.
- Yoshimoto, K., Hanaoka, H., Sato, S., Kato, T., Tabata, S., Noda, T., and Ohsumi, Y.** (2004). Processing of ATG8s, ubiquitin-like proteins, and their deconjugation by ATG4s are essential for plant autophagy. *Plant Cell* **16**: 2967-2983.
- Zhang, H., Dong, S., Wang, M., Wang, W., Song, W., Dou, X., Zheng, X., and Zhang, Z.** (2010). The role of vacuolar processing enzyme (VPE) from *Nicotiana benthamiana* in the elicitor-triggered hypersensitive response and stomatal closure. *Journal of Experimental Botany* **61**: 3799–3812.
- Zhou, J., Yu, J.Q., and Chen, Z.** (2014). The perplexing role of autophagy in plant innate immune responses. *Molecular plant pathology* **15**: 637-645.



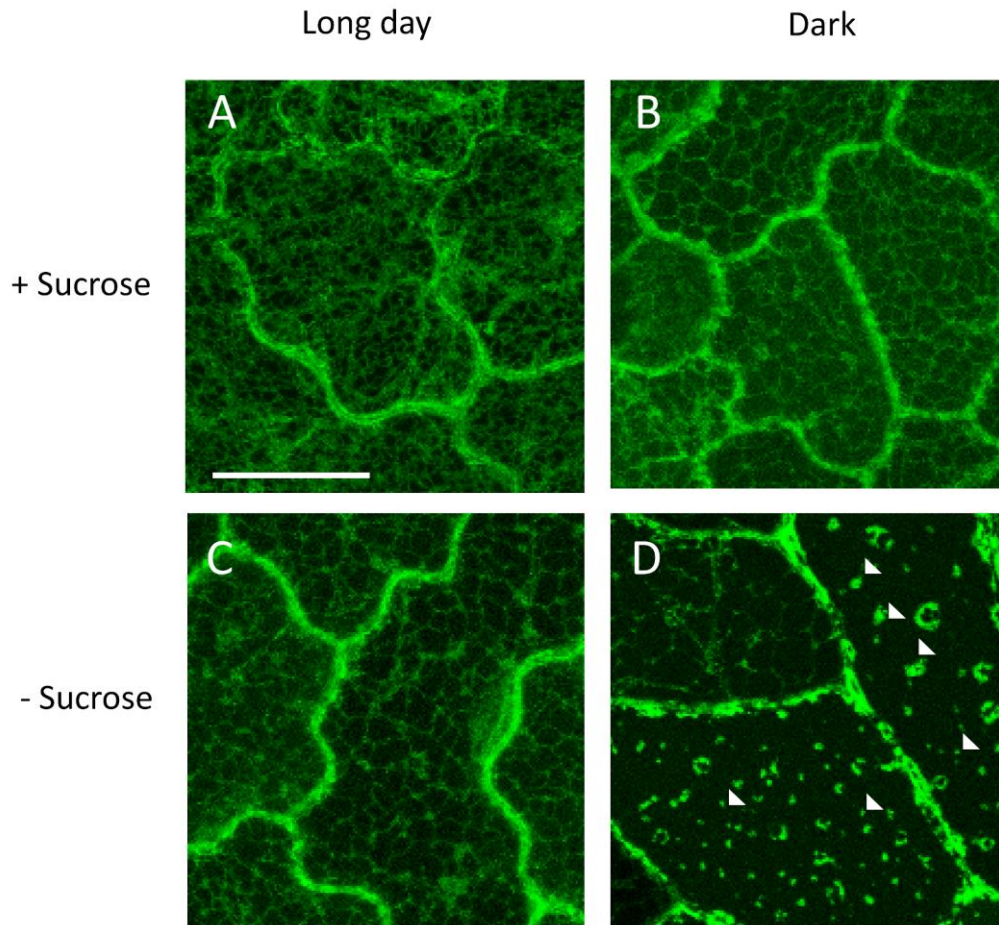

**Figure 1.** StVPE1-GFP Localizes in Puncta in Potato Leaf Cells under Carbon Starvation.

(A) Transgenic potato plants overexpressing StVPE1-GFP were grown for 7 days at 25°C in culture medium supplemented with sucrose (+Sucrose) under long day (16 h light) conditions.

(B) As in (A) but plants were grown in the dark.

(C) As in (A) but culture medium did not contain sucrose (-Sucrose).

(D) As in (C) but plants were grown in the dark.

Arrowheads indicate StVPE1-GFP puncta formed under carbon starvation and dark conditions. Bar = 20  $\mu$ M.

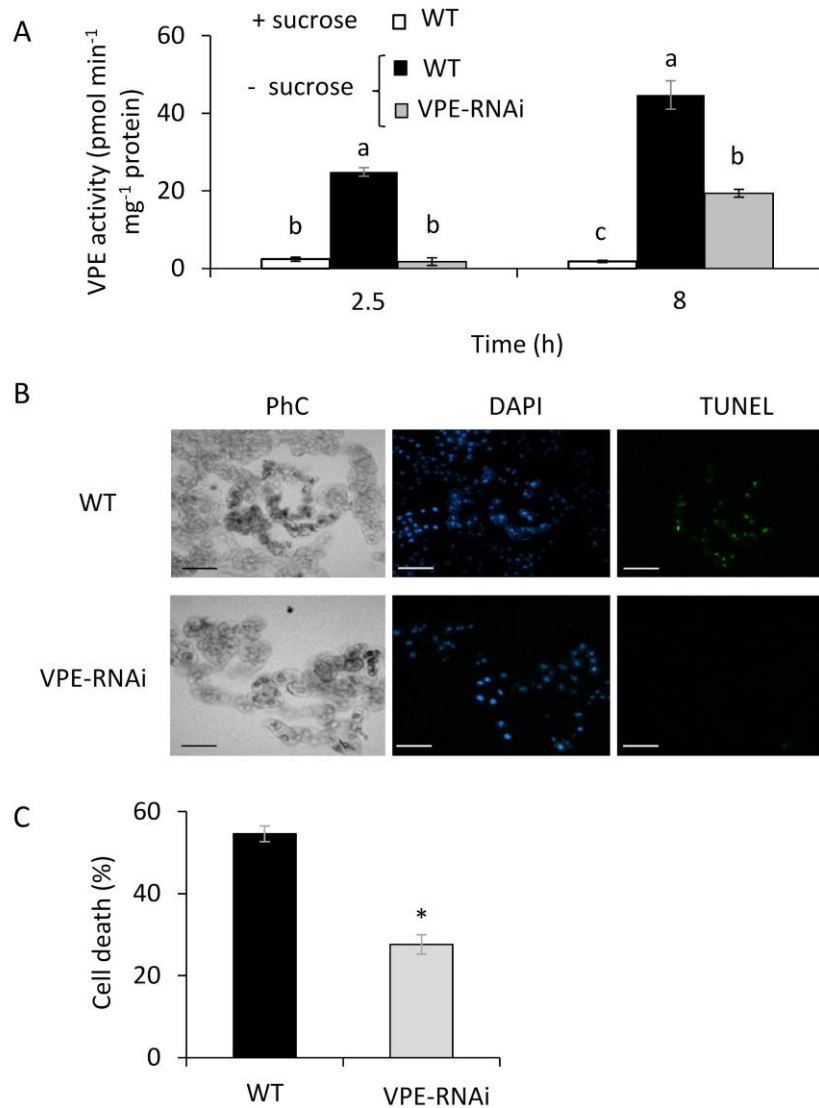

**Figure 2.** Silencing VPE Activity in BY-2 Cells Decreases PCD under Carbon Starvation.

**(A)** VPE activity in VPE-RNAi-transgenic BY-2 cells was compared to that in WT cells in the presence (+) or absence (-) of sucrose. Ac-ESEN-MCA was used as the VPE-specific substrate. Different letters represent significant differences between genotypes at different time points ( $P < 0.005$ ) analyzed by ANOVA followed by Tukey–Kramer HSD test.

**(B)** Cells subjected to 24 h of carbon starvation were counterstained in situ with DAPI to label nuclei (blue), followed by TUNEL reagents to detect DNA fragmentation (green). Corresponding phase contrast (PhC) images of the cells are also shown. Bars = 100  $\mu\text{m}$ .

**(C)** Quantification of non-viable cells. Five-day-old tobacco BY-2 WT and StVPE1-RNAi cells were subjected to 24 h of carbon starvation and stained with Evans blue. The percentage of dead cells was calculated using ImageJ software. Asterisk represents significant difference at  $P < 0.05$  analyzed by t-test.

Data are mean  $\pm$  SE of three repeats, each with 100 cells.

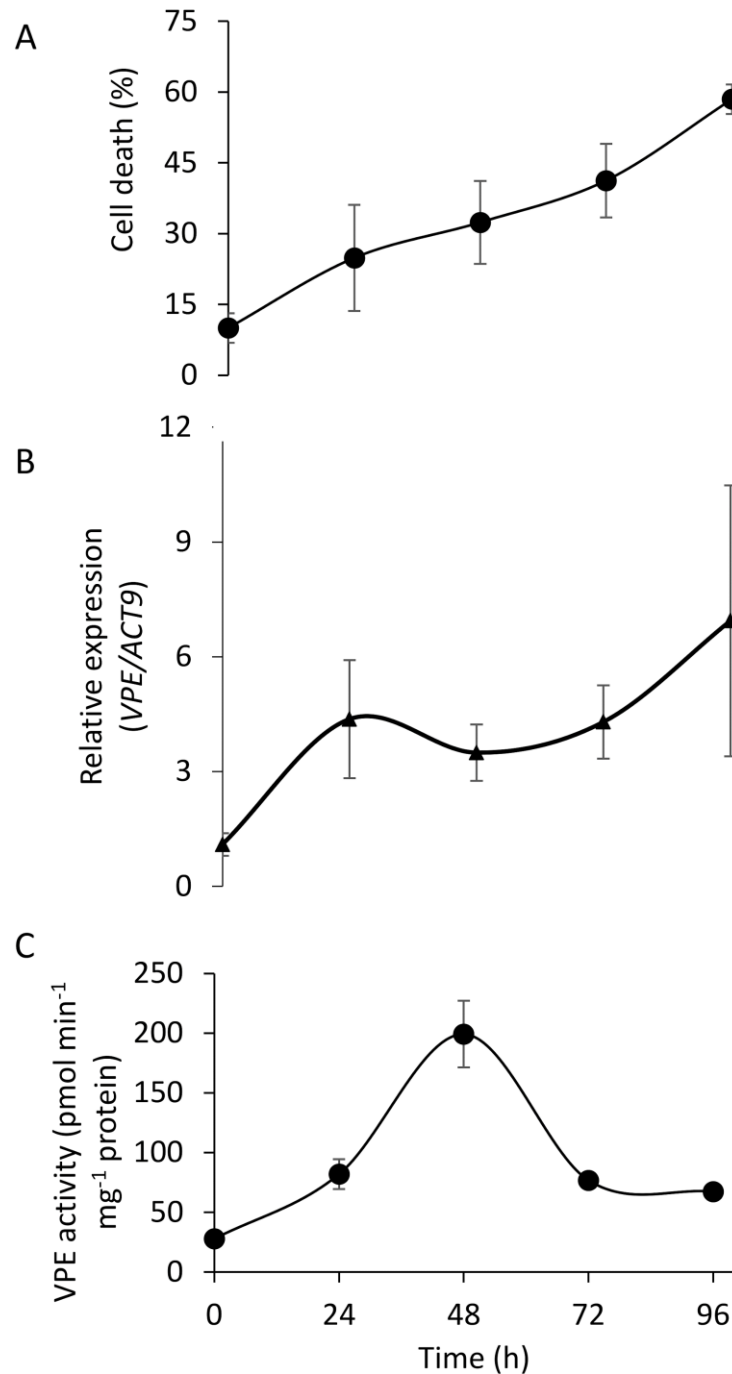

**Figure 3.** VPE Activity Is Upregulated in the Early Phase of Carbon Starvation, Inducing PCD.

Six-day-old culture of BY-2 cells was exposed to 96 h of sucrose-free medium.

**(A)** Cell death; cells were stained with Evans blue.

**(B)** Expression levels of VPE1-like (endogenous and exogenous from tobacco and potato, respectively), relative to that of *Actin9* (*ACT9*) as analyzed by quantitative RT-PCR.

**(C)** VPE activity, measured using the VPE-specific substrate Ac-ESEN-MCA.

Data are means  $\pm$  SE of three experiments.

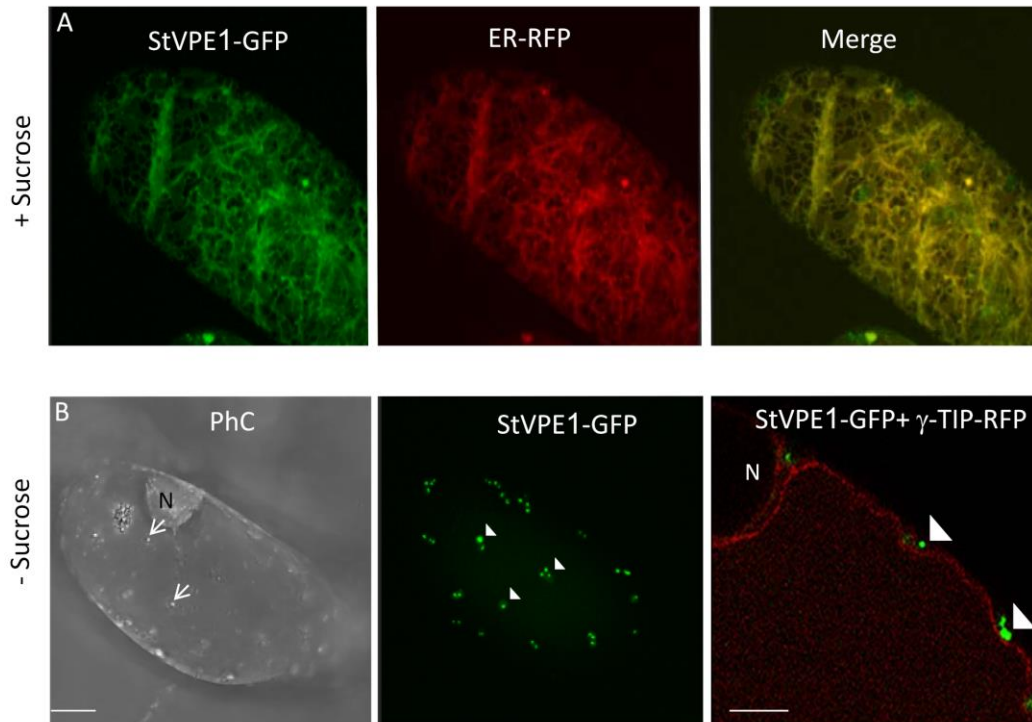

**Figure 4.** Carbon Starvation Induces StVPE1-GFP Relocalization in BY-2 Cells. Confocal images of BY-2 cells incubated in sucrose-supplemented (+Sucrose) or sucrose-free medium (-Sucrose) for 48 h expressing: **(A)** StVPE1-GFP (in green) + ER-RFP (in red). **(B)** StVPE1-GFP (in green) +  $\gamma$ -TIP-RFP (tonoplast marker, in red). Arrows indicate cytoplasmic vesicles; arrowheads indicate punctate StVPE1-GFP. Images are shown as Z-stack projection or one optic section. Bars = 10  $\mu$ m in (A) and (B), 5  $\mu$ m in the right picture of B. PhC, phase contrast; N, nucleus.

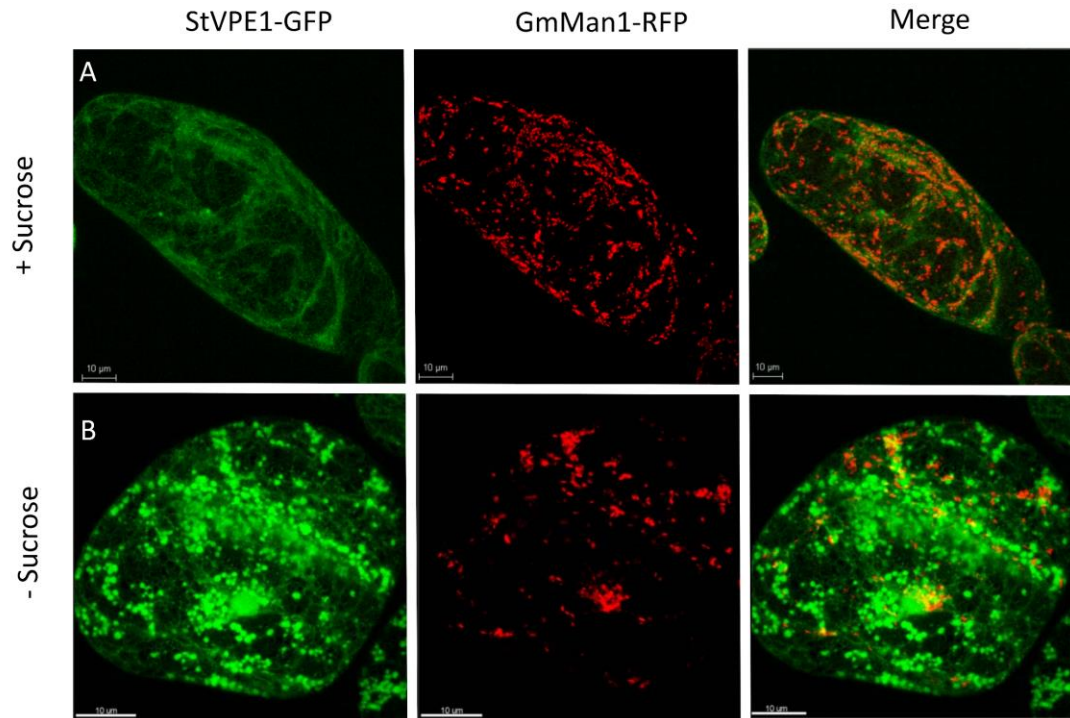

**Figure 5.** StVPE1-GFP Does Not Colocalize to the Golgi of BY-2 Cells under Carbon Starvation.

Six-day-old BY-2 cells coexpressing StVPE1-GFP (in green) and the Golgi marker GmMan1-RFP (in red) were incubated for 48 h.

(A) Medium with sucrose.

(B) Sucrose-free medium.

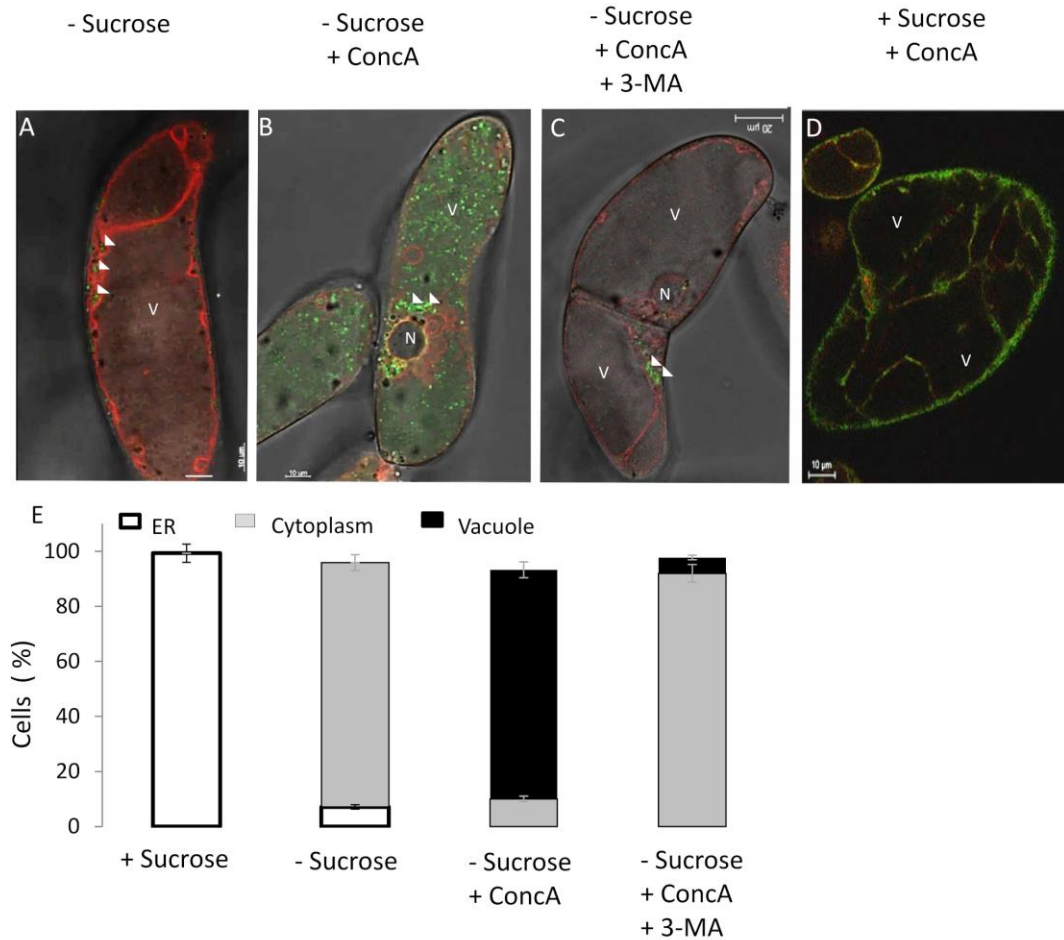

**Figure 6.** StVPE1-GFP Translocates to the Vacuole during Carbon Starvation. Six-day-old BY-2 cells coexpressing StVPE1-GFP (in green) and  $\gamma$ -TIP-RFP (tonoplast marker, in red) were incubated for 72 h in various media. **(A)** - Sucrose: sucrose-free medium. **(B)** - Sucrose + ConcA: sucrose-free medium with 1  $\mu$ M concanamycin A (ConcA). **(C)** - Sucrose + ConcA + 3-MA: sucrose-free medium with 1  $\mu$ M ConcA, and 5 mM 3-methyladenine (3-MA) for the last 48 h of incubation. **(D)** + Sucrose + ConcA: control – BY-2 cells were exposed to sucrose-containing medium for 72 h with 1  $\mu$ M ConcA added for the last 48 h. **(E)** Quantitative analysis of StVPE1-GFP localization in (A)–(D). Arrowheads indicate StVPE1-GFP aggregates. Bars = 10  $\mu$ m in (A), (B) and (D), 20  $\mu$ m in (C). N, nucleus; V, vacuole.

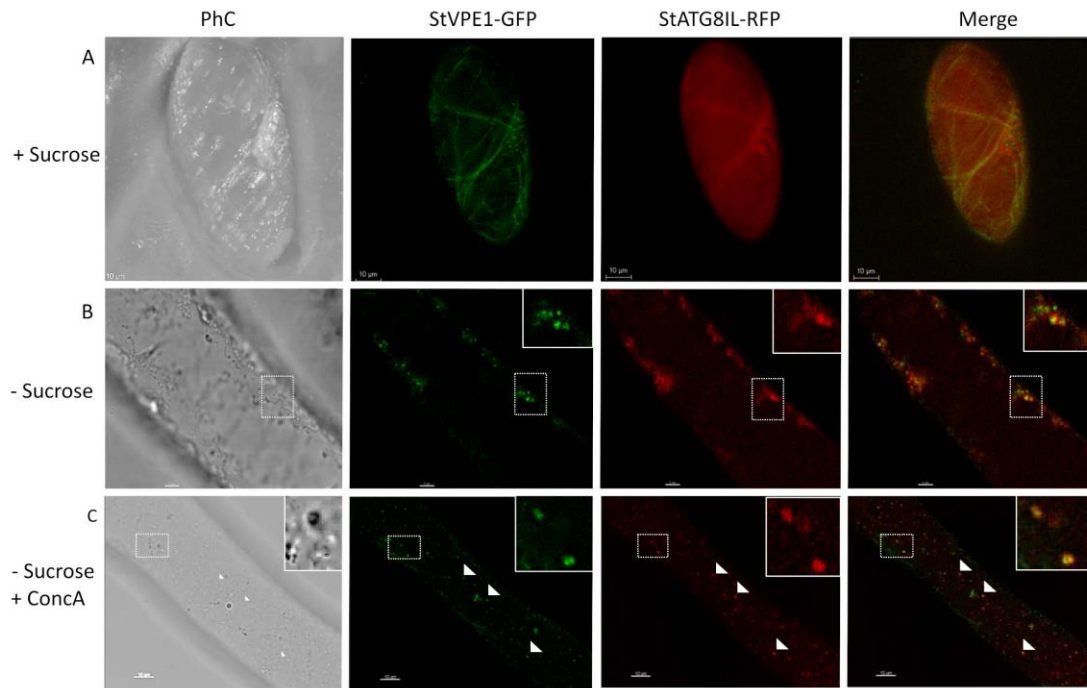

**Figure 7.** StVPE1-GFP Colocalizes with StATG8IL-RFP under Carbon Starvation.

Six-day-old BY-2 cells expressing StVPE1-GFP (green) and StATG8IL-RFP (red) were incubated for 72 h.

**(A)** + Sucrose: with sucrose (shown as a 3D image view).

**(B)** - Sucrose: under carbon starvation. Inset, magnified view of boxed area.

**(C)** - Sucrose + ConcA: as in (B) but with concanamycin A (1  $\mu$ M) added for the last 48 h. Inset, magnified view of boxed area.

Arrowheads indicate colocalization of StVPE1-GFP and StATG8IL-RFP (yellow puncta).

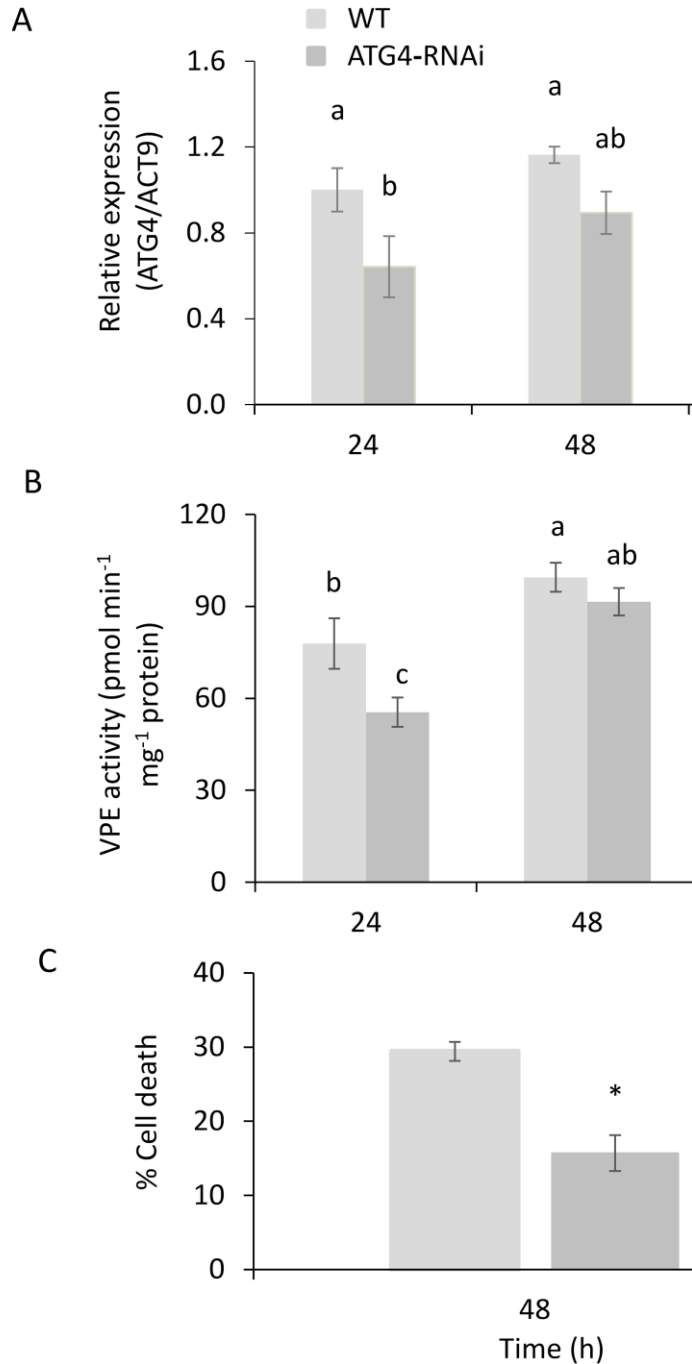

**Figure 8.** ATG4 Is Required for VPE Activity and Cell Death of BY-2 Cells under Carbon Starvation.

**(A)** Expression level of *ATG4* relative to that of *Actin9* (*ACT9*) as analyzed by quantitative RT-PCR.

**(B)** VPE activity, measured using the VPE-specific substrate Ac-ESEN-MCA.

**(C)** Quantification of cell death by Evans blue staining in ATG4-RNAi compared to WT cells.

Different letters and asterisk represent significant differences ( $P < 0.05$ ) by ANOVA followed by Tukey-Kramer HSD and t-test, respectively. Data are mean  $\pm$  SE of three repeats, each with 100 cells.



## Parsed Citations

**Abràmoff, M.D., Magalhães, P.J., and Ram, S.J. (2004).** Image processing with ImageJ. *Biophotonics International* 11: 36-43.

Pubmed: [Author and Title](#)

Google Scholar: [Author Only](#) [Title Only](#) [Author and Title](#)

**Aubert, S., Gout, E., Bligny, R., Marty-Mazars, D., Barrieu, F., Alabouvette, J., Marty, F., and Douce, R. (1996).** Ultrastructural and biochemical characterization of autophagy in higher plant cells subjected to carbon deprivation: control by the supply of mitochondria with respiratory substrates. *Journal of Cell Biology* 133: 1251-1263.

Pubmed: [Author and Title](#)

Google Scholar: [Author Only](#) [Title Only](#) [Author and Title](#)

**Avin-Wittenberg, T., Bajdzienko, K., Wittenberg, G., Alseekh, S., Tohge, T., Bock, R., Giavalisco, P., and Fernie, A.R. (2015).** Global analysis of the role of autophagy in cellular metabolism and energy homeostasis in *Arabidopsis* seedlings under carbon starvation. *The Plant Cell* 27: 306-322.

Pubmed: [Author and Title](#)

Google Scholar: [Author Only](#) [Title Only](#) [Author and Title](#)

**Avin-Wittenberg, T., Baluška, F., Bozhkov, P.V., Elander, P.H., Fernie, A.R., Galili, G., Hassan, A., Hofius, D., Isono, E., and Le Bars, R. (2018).** Autophagy-related approaches for improving nutrient use efficiency and crop yield protection. *Journal of experimental botany* 69: 1335-1353.

Pubmed: [Author and Title](#)

Google Scholar: [Author Only](#) [Title Only](#) [Author and Title](#)

**Azevedo, H., Dias, A., and Tavares, R.M. (2008).** Establishment and characterization of *Pinus pinaster* suspension cell cultures. *Plant Cell, Tissue and Organ Culture* 93: 115-121.

Pubmed: [Author and Title](#)

Google Scholar: [Author Only](#) [Title Only](#) [Author and Title](#)

**Azevedo, H., Castro, P.H., Gonçalves, J.F., Lino-Neto, T., and Tavares, R.M. (2014).** Impact of carbon and phosphate starvation on growth and programmed cell death of maritime pine suspension cells. *In Vitro Cellular & Developmental Biology-Plant* 50: 478-486.

Pubmed: [Author and Title](#)

Google Scholar: [Author Only](#) [Title Only](#) [Author and Title](#)

**Bárány, I., Berenguer, E., Solís, M.-T., Pérez-Pérez, Y., Santamaría, M.E., Crespo, J.L., Risueño, M.C., Díaz, I., and Testillano, P.S. (2018).** Autophagy is activated and involved in cell death with participation of cathepsins during stress-induced microspore embryogenesis in barley. *Journal of Experimental Botany* 69: 1387-1402.

Pubmed: [Author and Title](#)

Google Scholar: [Author Only](#) [Title Only](#) [Author and Title](#)

**Bassham, D.C. (2015).** Methods for analysis of autophagy in plants. *Methods* 75: 181-188.

Pubmed: [Author and Title](#)

Google Scholar: [Author Only](#) [Title Only](#) [Author and Title](#)

**Belenghi, B., Salomon, M., and Levine, A. (2004).** Caspase-like activity in the seedlings of *Pisum sativum* eliminates weaker shoots during early vegetative development by induction of cell death. *Journal of Experimental Botany* 55: 889-897.

Pubmed: [Author and Title](#)

Google Scholar: [Author Only](#) [Title Only](#) [Author and Title](#)

**Bonneau, L., Ge, Y., Drury, G.E., and Gallois, P. (2008).** What happened to plant caspases? *Journal of Experimental Botany* 59: 491-499.

Pubmed: [Author and Title](#)

Google Scholar: [Author Only](#) [Title Only](#) [Author and Title](#)

**Cai, Y.-m., and Gallois, P. (2015).** Programmed Cell Death Regulation by Plant Proteases with Caspase-Like Activity. In *Plant Programmed Cell Death* (Springer), pp. 191-202.

Pubmed: [Author and Title](#)

Google Scholar: [Author Only](#) [Title Only](#) [Author and Title](#)

**Chen, L., Guo, Y., Bai, G., Sun, J., and Li, Y. (2015).** Effect of 5-aminolevulinic acid and genistein on accumulation of polyphenol and anthocyanin in 'Qinyang' apples. *Journal of Animal and Plant Science* 25: 68-79.

Pubmed: [Author and Title](#)

Google Scholar: [Author Only](#) [Title Only](#) [Author and Title](#)

**Coll, N., Smidler, A., Puigvert, M., Poca, C., Valls, M., and Dangl, J. (2014).** The plant metacaspase AtMC1 in pathogen-triggered programmed cell death and aging: functional linkage with autophagy. *Cell Death and Differentiation* 21: 1399.

Pubmed: [Author and Title](#)

Google Scholar: [Author Only](#) [Title Only](#) [Author and Title](#)

**Contento, A.L., Kim, S.-J., and Bassham, D.C. (2004).** Transcriptome profiling of the response of *Arabidopsis* suspension culture

cells to Suc starvation. *Plant Physiology* 135: 2330-2347.

Pubmed: [Author and Title](#)

Google Scholar: [Author Only](#) [Title Only](#) [Author and Title](#)

Crawford, E.D., and Wells, J.A. (2011). Caspase substrates and cellular remodeling. *Annual Review of Biochemistry* 80: 1055-1087.

Pubmed: [Author and Title](#)

Google Scholar: [Author Only](#) [Title Only](#) [Author and Title](#)

Dagdas, Y.F., Belhaj, K., Maqbool, A., Chaparro-Garcia, A., Pandey, P., Petre, B., Tabassum, N., Cruz-Mireles, N., Hughes, R.K., and Sklenar, J. (2016). An effector of the Irish potato famine pathogen antagonizes a host autophagy cargo receptor. *Elife* 5: e10856.

Pubmed: [Author and Title](#)

Google Scholar: [Author Only](#) [Title Only](#) [Author and Title](#)

Dagdas, Y.F., Pandey, P., Turtas, Y., Sanguankiattichai, N., Belhaj, K., Duggan, C., Leary, A.Y., Segretin, M.E., Contreras, M.P., and Savage, Z. (2018). Host autophagy machinery is diverted to the pathogen interface to mediate focal defense responses against the Irish potato famine pathogen. *Elife* 7: e37476.

Pubmed: [Author and Title](#)

Google Scholar: [Author Only](#) [Title Only](#) [Author and Title](#)

Del Río, L.A. (2015). ROS and RNS in plant physiology: an overview. *Journal of Experimental Botany* 66: 2827-2837.

Pubmed: [Author and Title](#)

Google Scholar: [Author Only](#) [Title Only](#) [Author and Title](#)

Devillard, C., and Walter, C. (2014). Formation of plant tracheary elements in vitro—a review. *New Zealand J Forestry Sci* 44: 22.

Pubmed: [Author and Title](#)

Google Scholar: [Author Only](#) [Title Only](#) [Author and Title](#)

Escamez, S., and Tuominen, H. (2014). Programmes of cell death and autolysis in tracheary elements: when a suicidal cell arranges its own corpse removal. *Journal of Experimental Botany*: eru057.

Pubmed: [Author and Title](#)

Google Scholar: [Author Only](#) [Title Only](#) [Author and Title](#)

Floyd, B.E., Pu, Y., Soto-Burgos, J., and Bassham, D.C. (2015). To Live or Die: Autophagy in Plants. In *Plant Programmed Cell Death* (Springer), pp. 269-300.

Pubmed: [Author and Title](#)

Google Scholar: [Author Only](#) [Title Only](#) [Author and Title](#)

Frydman, A., Weisshaus, O., Bar-Peled, M., Huhman, D.V., Sumner, L.W., Marin, F.R., Lewinsohn, E., Fluhr, R., Gressel, J., and Eyal, Y. (2004). Citrus fruit bitter flavors: isolation and functional characterization of the gene Cm1, 2RhaT encoding a 1, 2 rhamnosyltransferase, a key enzyme in the biosynthesis of the bitter flavonoids of citrus. *The Plant Journal* 40: 88-100.

Pubmed: [Author and Title](#)

Google Scholar: [Author Only](#) [Title Only](#) [Author and Title](#)

Galluzzi, L., Baehrecke, E.H., Ballabio, A., Boya, P., Bravo-San Pedro, J.M., Cecconi, F., Choi, A.M., Chu, C.T., Codogno, P., and Colombo, M.I. (2017). Molecular definitions of autophagy and related processes. *The EMBO journal* 36: 1811-1836.

Pubmed: [Author and Title](#)

Google Scholar: [Author Only](#) [Title Only](#) [Author and Title](#)

Hackenberg, T., Juul, T., Auzina, A., Gwiżdż, S., Małolepszy, A., Van Der Kelen, K., Dam, S., Bressendorff, S., Lorentzen, A., and Roepstorff, P. (2013). Catalase and NO CATALASE ACTIVITY1 promote autophagy-dependent cell death in *Arabidopsis*. *The Plant Cell* 25: 4616-4626.

Pubmed: [Author and Title](#)

Google Scholar: [Author Only](#) [Title Only](#) [Author and Title](#)

Han, S., Wang, Y., Zheng, X., Jia, Q., Zhao, J., Bai, F., Hong, Y., and Liu, Y. (2015). Cytoplasmic glyceraldehyde-3-phosphate dehydrogenases interact with ATG3 to negatively regulate autophagy and immunity in *Nicotiana benthamiana*. *The Plant Cell* 27: 1316-1331.

Pubmed: [Author and Title](#)

Google Scholar: [Author Only](#) [Title Only](#) [Author and Title](#)

Hanamata, S., Kurusu, T., Okada, M., Suda, A., Kawamura, K., Tsukada, E., and Kuchitsu, K. (2013). In vivo imaging and quantitative monitoring of autophagic flux in tobacco BY-2 cells. *Plant Signaling & Behavior* 8.

Pubmed: [Author and Title](#)

Google Scholar: [Author Only](#) [Title Only](#) [Author and Title](#)

Hara-Nishimura, I., and Hatsugai, N. (2011). The role of vacuole in plant cell death. *Cell Death Differentiation* 18: 1298-1304.

Pubmed: [Author and Title](#)

Google Scholar: [Author Only](#) [Title Only](#) [Author and Title](#)

Hara-Nishimura, I., Inoue, K., and Nishimura, M. (1991). A unique vacuolar processing enzyme responsible for conversion of

several proprotein precursors into the mature forms. *FEBS letters* 294: 89-93.

Pubmed: [Author and Title](#)

Google Scholar: [Author Only](#) [Title Only](#) [Author and Title](#)

Hara-Nishimura, I., Takeuchi, Y., and Nishimura, M. (1993). Molecular characterization of a vacuolar processing enzyme related to a putative cysteine proteinase of *Schistosoma mansoni*. *The Plant Cell* 5: 1651-1659.

Pubmed: [Author and Title](#)

Google Scholar: [Author Only](#) [Title Only](#) [Author and Title](#)

Hara-Nishimura, I., Hatsugai, N., Nakaune, S., Kuroyanagi, M., and Nishimura, M. (2005). Vacuolar processing enzyme: an executor of plant cell death. *Current Opinion in Plant Biology* 8: 404-408.

Pubmed: [Author and Title](#)

Google Scholar: [Author Only](#) [Title Only](#) [Author and Title](#)

Hatsugai, N., Kuroyanagi, M., Nishimura, M., and Hara-Nishimura, I. (2006). A cellular suicide strategy of plants: vacuole-mediated cell death. *Apoptosis* 11: 905-911.

Pubmed: [Author and Title](#)

Google Scholar: [Author Only](#) [Title Only](#) [Author and Title](#)

Hatsugai, N., Yamada, K., Goto-Yamada, S., and Hara-Nishimura, I. (2015). Vacuolar processing enzyme in plant programmed cell death. *Frontiers in Plant Science* 6: 234.

Pubmed: [Author and Title](#)

Google Scholar: [Author Only](#) [Title Only](#) [Author and Title](#)

Hatsugai, N., Kuroyanagi, M., Yamada, K., Meshi, T., Tsuda, S., Kondo, M., Nishimura, M., and Hara-Nishimura, I. (2004). A plant vacuolar protease, VPE, mediates virus-induced hypersensitive cell death. *Science* 305: 855-858.

Pubmed: [Author and Title](#)

Google Scholar: [Author Only](#) [Title Only](#) [Author and Title](#)

Hayashi, Y., Yamada, K., Shimada, T., Matsushima, R., Nishizawa, N., Nishimura, M., and Hara-Nishimura, I. (2001). A proteinase-storing body that prepares for cell death or stresses in the epidermal cells of *Arabidopsis*. *Plant and Cell Physiology* 42: 894-899.

Pubmed: [Author and Title](#)

Google Scholar: [Author Only](#) [Title Only](#) [Author and Title](#)

He, C., and Klionsky, D.J. (2009). Regulation mechanisms and signaling pathways of autophagy. *Annual Review Genetics* 43: 67.

Pubmed: [Author and Title](#)

Google Scholar: [Author Only](#) [Title Only](#) [Author and Title](#)

Hofius, D., Schultz-Larsen, T., Joensen, J., Tsitsigiannis, D.I., Petersen, N.H., Mattsson, O., Jørgensen, L.B., Jones, J.D., Mundy, J., and Petersen, M. (2009). Autophagic components contribute to hypersensitive cell death in *Arabidopsis*. *Cell* 137: 773-783.

Pubmed: [Author and Title](#)

Google Scholar: [Author Only](#) [Title Only](#) [Author and Title](#)

Horsch, R., Rogers, S., and Fraley, R. (1985). Transgenic plants. In *Cold Spring Harbor symposia on quantitative biology* (Cold Spring Harbor Laboratory Press), pp. 433-437.

Pubmed: [Author and Title](#)

Google Scholar: [Author Only](#) [Title Only](#) [Author and Title](#)

Iakimova, E.T., and Woltering, E.J. (2017). Xylogenesis in zinnia (*Zinnia elegans*) cell cultures: unravelling the regulatory steps in a complex developmental programmed cell death event. *Planta* 245: 681-705.

Pubmed: [Author and Title](#)

Google Scholar: [Author Only](#) [Title Only](#) [Author and Title](#)

Iakimova, E.T., Yordanova, Z.P., Cristescu, S.M., Harren, F.J., and Woltering, E.J. (2019). Cell death signaling and morphology in chemical-treated tobacco BY-2 suspension cultured cells. *Environmental and Experimental Botany* 164: 157-169.

Pubmed: [Author and Title](#)

Google Scholar: [Author Only](#) [Title Only](#) [Author and Title](#)

Jones, A.M., Coimbra, S., Fath, A., Sottomayor, M., and Thomas, H. (2001). Programmed cell death assays for plants. *Methods in Cell Biology* 66: 437-451.

Pubmed: [Author and Title](#)

Google Scholar: [Author Only](#) [Title Only](#) [Author and Title](#)

Kabbage, M., Kessens, R., Bartholomay, L.C., and Williams, B. (2017). The Life and Death of a Plant Cell. *Annual Review of Plant Biology* 68.

Pubmed: [Author and Title](#)

Google Scholar: [Author Only](#) [Title Only](#) [Author and Title](#)

Kabeja, Y., Mizushima, N., Ueno, T., Yamamoto, A., Kirisako, T., Noda, T., Kominami, E., Ohsumi, Y., and Yoshimori, T. (2000). LC3, a mammalian homologue of yeast Apg8p, is localized in autophagosome membranes after processing. *EMBO Journal* 19: 5720-5728.

Pubmed: [Author and Title](#)  
Google Scholar: [Author Only](#) [Title Only](#) [Author and Title](#)

**Kalvari, I., Tsompanis, S., Mulakkal, N.C., Osgood, R., Johansen, T., Nezis, I.P., and Promponas, V.J. (2014). iLIR: A web resource for prediction of Atg8-family interacting proteins. *Autophagy* 10: 913-925.**

Pubmed: [Author and Title](#)  
Google Scholar: [Author Only](#) [Title Only](#) [Author and Title](#)

**Kariya, K., Tsuchiya, Y., Sasaki, T., and Yamamoto, Y. (2018). Aluminium-induced cell death requires upregulation of NtVPE1 gene coding vacuolar processing enzyme in tobacco (*Nicotiana tabacum* L.). *Journal of Inorganic Biochemistry* 181: 152-161.**

Pubmed: [Author and Title](#)  
Google Scholar: [Author Only](#) [Title Only](#) [Author and Title](#)

**Kariya, K., Demiral, T., Sasaki, T., Tsuchiya, Y., Turkan, I., Sano, T., Hasezawa, S., and Yamamoto, Y. (2013). A novel mechanism of aluminium-induced cell death involving vacuolar processing enzyme and vacuolar collapse in tobacco cell line BY-2. *Journal of Inorganic Biochemistry* 128: 196-201.**

Pubmed: [Author and Title](#)  
Google Scholar: [Author Only](#) [Title Only](#) [Author and Title](#)

**Kellner, R., De la Concepcion, J.C., Maqbool, A., Kamoun, S., and Dagdas, Y.F. (2017). ATG8 expansion: a driver of selective autophagy diversification? *Trends in plant science* 22: 204-214.**

Pubmed: [Author and Title](#)  
Google Scholar: [Author Only](#) [Title Only](#) [Author and Title](#)

**Keunen, E., Peshev, D., Vangronsveld, J., Van Den Ende, W., and Cuypers, A. (2013). Plant sugars are crucial players in the oxidative challenge during abiotic stress: extending the traditional concept. *Plant, Cell & Environment* 36: 1242-1255.**

Pubmed: [Author and Title](#)  
Google Scholar: [Author Only](#) [Title Only](#) [Author and Title](#)

**Kinoshita, T., Yamada, K., Hiraiwa, N., Kondo, M., Nishimura, M., and Hara-Nishimura, I. (1999). Vacuolar processing enzyme is up-regulated in the lytic vacuoles of vegetative tissues during senescence and under various stressed conditions. *Plant Journal* 19: 43-53.**

Pubmed: [Author and Title](#)  
Google Scholar: [Author Only](#) [Title Only](#) [Author and Title](#)

**Kirisako, T., Baba, M., Ishihara, N., Miyazawa, K., Ohsumi, M., Yoshimori, T., Noda, T., and Ohsumi, Y. (1999). Formation process of autophagosome is traced with Apg8/Aut7p in yeast. *Journal of Cell Biology* 147: 435-446.**

Pubmed: [Author and Title](#)  
Google Scholar: [Author Only](#) [Title Only](#) [Author and Title](#)

**Kirisako, T., Ichimura, Y., Okada, H., Kabeya, Y., Mizushima, N., Yoshimori, T., Ohsumi, M., Takao, T., Noda, T., and Ohsumi, Y. (2000). The reversible modification regulates the membrane-binding state of Apg8/Aut7 essential for autophagy and the cytoplasm to vacuole targeting pathway. *Journal of Cell Biology* 151: 263-276.**

Pubmed: [Author and Title](#)  
Google Scholar: [Author Only](#) [Title Only](#) [Author and Title](#)

**Klionsky, D.J., Abdelmohsen, K., Abe, A., Abedin, M.J., Abeliovich, H., Acevedo Arozena, A., Adachi, H., Adams, C.M., Adams, P.D., and Adeli, K. (2016). Guidelines for the use and interpretation of assays for monitoring autophagy. *Autophagy* 12: 1-222.**

Pubmed: [Author and Title](#)  
Google Scholar: [Author Only](#) [Title Only](#) [Author and Title](#)

**Kroemer, G., Galluzzi, L., Vandenabeele, P., Abrams, J., Alnemri, E.S., Baehrecke, E., Blagosklonny, M., El-Deiry, W., Golstein, P., and Green, D. (2008). Classification of cell death: recommendations of the Nomenclature Committee on Cell Death 2009. *Cell Death & Differentiation* 16: 3-11.**

Pubmed: [Author and Title](#)  
Google Scholar: [Author Only](#) [Title Only](#) [Author and Title](#)

**Kuroyanagi, M., Nishimura, M., and Hara-Nishimura, I. (2002). Activation of Arabidopsis vacuolar processing enzyme by self-catalytic removal of an auto-inhibitory domain of the C-terminal propeptide. *Plant Cell Physiol* 43: 143-151.**

Pubmed: [Author and Title](#)  
Google Scholar: [Author Only](#) [Title Only](#) [Author and Title](#)

**Kuroyanagi, M., Yamada, K., Hatsugai, N., Kondo, M., Nishimura, M., and Hara-Nishimura, I. (2005). Vacuolar processing enzyme is essential for mycotoxin-induced cell death in *Arabidopsis thaliana*. *Journal of Biological Chemistry* 280: 32914-32920.**

Pubmed: [Author and Title](#)  
Google Scholar: [Author Only](#) [Title Only](#) [Author and Title](#)

**Kutik, J., Kuthanova, A., Smertenko, A., Fischer, L., and Opatrny, Z. (2014). Cadmium-induced cell death in BY-2 cell culture starts with vacuolization of cytoplasm and terminates with necrosis. *Physiologia Plantarum* 151: 423-433.**

Pubmed: [Author and Title](#)  
Google Scholar: [Author Only](#) [Title Only](#) [Author and Title](#)

Leary, A.Y., Sanguankiatichai, N., Duggan, C., Tumbas, Y., Pandey, P., Segretin, M.E., Salguero Linares, J., Savage, Z.D., Yow, R.J., and Bozkurt, T.O. (2017). Modulation of plant autophagy during pathogen attack. *Journal of experimental botany* 69: 1325-1333.

Pubmed: [Author and Title](#)

Google Scholar: [Author Only](#) [Title Only](#) [Author and Title](#)

Marshall, R.S., and Vierstra, R.D. (2018). Autophagy: the master of bulk and selective recycling. *Annual Review of Plant Biology* 69: 173-208.

Pubmed: [Author and Title](#)

Google Scholar: [Author Only](#) [Title Only](#) [Author and Title](#)

Marshall, R.S., Hua, Z., Mali, S., McLoughlin, F., and Vierstra, R.D. (2019). ATG8-binding UIM proteins define a new class of autophagy adaptors and receptors. *Cell* 177: 766-781. e724.

Pubmed: [Author and Title](#)

Google Scholar: [Author Only](#) [Title Only](#) [Author and Title](#)

Miao, E.A., Rajan, J.V., and Aderem, A. (2011). Caspase-1-induced pyroptotic cell death. *Immunological reviews* 243: 206-214.

Pubmed: [Author and Title](#)

Google Scholar: [Author Only](#) [Title Only](#) [Author and Title](#)

Michaeli, S., Avin-Wittenberg, T., and Galili, G. (2014). Involvement of autophagy in the direct ER to vacuole protein trafficking route in plants. *Frontiers in Plant Science* 5: 134.

Pubmed: [Author and Title](#)

Google Scholar: [Author Only](#) [Title Only](#) [Author and Title](#)

Minina, E.A., Bozhkov, P.V., and Hofius, D. (2014a). Autophagy as initiator or executioner of cell death. *Trends in Plant Science*.

Pubmed: [Author and Title](#)

Google Scholar: [Author Only](#) [Title Only](#) [Author and Title](#)

Minina, E.A., Smertenko, A.P., and Bozhkov, P.V. (2014b). Vacuolar cell death in plants. *Autophagy* 10: 1-2.

Pubmed: [Author and Title](#)

Google Scholar: [Author Only](#) [Title Only](#) [Author and Title](#)

Minina, E.A., Filonova, L.H., Fukada, K., Savenkov, E.I., Gogvadze, V., Clapham, D., Sanchez-Vera, V., Suarez, M.F., Zhivotovsky, B., and Daniel, G. (2013). Autophagy and metacaspase determine the mode of cell death in plants. *J Cell Biol* 203: 917-927.

Pubmed: [Author and Title](#)

Google Scholar: [Author Only](#) [Title Only](#) [Author and Title](#)

Moriyasu, Y., and Ohsumi, Y. (1996). Autophagy in tobacco suspension-cultured cells in response to sucrose starvation. *Plant Physiology* 111: 1233-1241.

Pubmed: [Author and Title](#)

Google Scholar: [Author Only](#) [Title Only](#) [Author and Title](#)

Müntz, K. (2007). Protein dynamics and proteolysis in plant vacuoles. *Journal of Experimental Botany* 58: 2391-2407.

Pubmed: [Author and Title](#)

Google Scholar: [Author Only](#) [Title Only](#) [Author and Title](#)

Nagata, T., Nemoto, Y., and Hasezawa, S. (1992). Tobacco BY-2 cell line as the "HeLa" cell in the cell biology of higher plants. *International Review of Cytology* 132: 1-30.

Pubmed: [Author and Title](#)

Google Scholar: [Author Only](#) [Title Only](#) [Author and Title](#)

Nelson, B.K., Cai, X., and Nebenführ, A. (2007). A multicolored set of in vivo organelle markers for co-localization studies in *Arabidopsis* and other plants. *Plant Journal* 51: 1126-1136.

Pubmed: [Author and Title](#)

Google Scholar: [Author Only](#) [Title Only](#) [Author and Title](#)

Nitsch, J., and Nitsch, C. (1969). Haploid plants from pollen grains. *Science* 163: 85-87.

Pubmed: [Author and Title](#)

Google Scholar: [Author Only](#) [Title Only](#) [Author and Title](#)

Pak, C., and Van Doorn, W.G. (2005). Delay of Iris flower senescence by protease inhibitors. *New Phytologist* 165: 473-480.

Pubmed: [Author and Title](#)

Google Scholar: [Author Only](#) [Title Only](#) [Author and Title](#)

Petrov, V., Hille, J., Mueller-Roeber, B., and Gechev, T.S. (2015). ROS-mediated abiotic stress-induced programmed cell death in plants. *Frontiers in Plant Science* 6.

Pubmed: [Author and Title](#)

Google Scholar: [Author Only](#) [Title Only](#) [Author and Title](#)

Rocha-Sosa, M., Sonnewald, U., Frommer, W., Stratmann, M., Schell, J., and Willmitzer, L. (1989). Both developmental and metabolic signals activate the promoter of a class I patatin gene. *EMBO Journal* 8: 23-29.

Pubmed: [Author and Title](#)  
Google Scholar: [Author Only](#) [Title Only](#) [Author and Title](#)

**Rajo, E., Zouhar, J., Carter, C., Kovaleva, V., and Raikhel, N.V. (2003). A unique mechanism for protein processing and degradation in *Arabidopsis thaliana*. *Proceedings of the National Academy of Sciences* 100: 7389-7394.**

Pubmed: [Author and Title](#)  
Google Scholar: [Author Only](#) [Title Only](#) [Author and Title](#)

**Rajo, E., Martín, R., Carter, C., Zouhar, J., Pan, S., Plotnikova, J., Jin, H., Paneque, M., Sánchez-Serrano, J.J., Baker, B., Frederick, M.A., and Natasha, V.R. (2004). VPEy exhibits a caspase-like activity that contributes to defense against pathogens. *Current Biology* 14: 1897-1906.**

Pubmed: [Author and Title](#)  
Google Scholar: [Author Only](#) [Title Only](#) [Author and Title](#)

**Rose, T.L., Bonneau, L., Der, C., Marty-Mazars, D., and Marty, F. (2006). Starvation-induced expression of autophagy-related genes in *Arabidopsis*. *Biology of The Cell* 98: 53-67.**

Pubmed: [Author and Title](#)  
Google Scholar: [Author Only](#) [Title Only](#) [Author and Title](#)

**Schaller, A., Stintzi, A., Rivas, S., Serrano, I., Chichkova, N.V., Vartapetian, A.B., Martínez, D., Guiamét, J.J., Sueldo, D.J., and Van Der Hoorn, R.A (2018). From structure to function—a family portrait of plant subtilases. *New Phytologist* 218: 901-915.**

Pubmed: [Author and Title](#)  
Google Scholar: [Author Only](#) [Title Only](#) [Author and Title](#)

**Shimada, T., Takagi, J., Ichino, T., Shirakawa, M., and Hara-Nishimura, I. (2018). Plant vacuoles. *Annual review of plant biology* 69: 123-145.**

Pubmed: [Author and Title](#)  
Google Scholar: [Author Only](#) [Title Only](#) [Author and Title](#)

**Silva, R.D., Sotoca, R., Johansson, B., Ludovico, P., Sansonetty, F., Silva, M.T., Peinado, J.M., and Côte Real, M. (2005). Hyperosmotic stress induces metacaspase and mitochondria dependent apoptosis in *Saccharomyces cerevisiae*. *Molecular Microbiology* 58: 824-834.**

Pubmed: [Author and Title](#)  
Google Scholar: [Author Only](#) [Title Only](#) [Author and Title](#)

**Smeekens, S., Ma, J., Hanson, J., and Rolland, F. (2010). Sugar signals and molecular networks controlling plant growth. *Current Opinion in Plant Biology* 13: 273-278.**

Pubmed: [Author and Title](#)  
Google Scholar: [Author Only](#) [Title Only](#) [Author and Title](#)

**Sueldo, D.J., and van der Hoorn, R.A (2017). Plant life needs cell death, but does plant cell death need Cys proteases? *The FEBS Journal* 284: 1577-1585.**

Pubmed: [Author and Title](#)  
Google Scholar: [Author Only](#) [Title Only](#) [Author and Title](#)

**Suzuki, N., Koussevitzky, S., Mittler, R., and Miller, G. (2012). ROS and redox signalling in the response of plants to abiotic stress. *Plant, Cell & Environment* 35: 259-270.**

Pubmed: [Author and Title](#)  
Google Scholar: [Author Only](#) [Title Only](#) [Author and Title](#)

**Takatsuka, C., Inoue, Y., Matsuoka, K., and Moriyasu, Y. (2004). 3-Methyladenine inhibits autophagy in tobacco culture cells under sucrose starvation conditions. *Plant Cell Physiol* 45: 265-274.**

Pubmed: [Author and Title](#)  
Google Scholar: [Author Only](#) [Title Only](#) [Author and Title](#)

**Tamura, K., Shimada, T., Ono, E., Tanaka, Y., Nagatani, A., Higashi, S.i., Watanabe, M., Nishimura, M., and Hara-Nishimura, I. (2003). Why green fluorescent fusion proteins have not been observed in the vacuoles of higher plants. *Plant Journal* 35: 545-555.**

Pubmed: [Author and Title](#)  
Google Scholar: [Author Only](#) [Title Only](#) [Author and Title](#)

**Tamura, T., Kioi, Y., Miki, T., Tsukiji, S., and Hamachi, I. (2013). Fluorophore labeling of native FKBP12 by ligand-directed tosyl chemistry allows detection of its molecular interactions in vitro and in living cells. *Journal of American Chemistry Society* 135: 6782-6785.**

Pubmed: [Author and Title](#)  
Google Scholar: [Author Only](#) [Title Only](#) [Author and Title](#)

**Teper-Bamolker, P., Buskila, Y., Lopesco, Y., Ben-Dor, S., Saad, I., Holdengreber, V., Belausov, E.d., Zemach, H., Ori, N., Lers, A., and Eshel, D. (2012). Release of apical dominance in potato tuber is accompanied by programmed cell death in the apical bud meristem. *Plant Physiology* 158: 2053-2067.**

Pubmed: [Author and Title](#)  
Google Scholar: [Author Only](#) [Title Only](#) [Author and Title](#)

Teper-Bamnlker, P., Buskila, Y., Belausov, E., Wolf, D., Doron-Faigenboim, A., Ben-Dor, S., Van der Hoorn, R.A., Lers, A., and Eshel, D. (2017). Vacuolar processing enzyme (VPE) activates programmed cell death in the apical meristem inducing loss of apical dominance. *Plant, Cell & Environment* 40: 2381-2392.

Pubmed: [Author and Title](#)

Google Scholar: [Author Only](#) [Title Only](#) [Author and Title](#)

Thompson, A.R., Doelling, J.H., Suttangkakul, A., and Vierstra, R.D. (2005). Autophagic nutrient recycling in Arabidopsis directed by the ATG8 and ATG12 conjugation pathways. *Plant Physiology* 138: 2097-2110.

Pubmed: [Author and Title](#)

Google Scholar: [Author Only](#) [Title Only](#) [Author and Title](#)

Tsakada, M., and Ohsumi, Y. (1993). Isolation and characterization of autophagy-defective mutants of *Saccharomyces cerevisiae*. *FEBS letters* 333: 169-174.

Pubmed: [Author and Title](#)

Google Scholar: [Author Only](#) [Title Only](#) [Author and Title](#)

Üstün, S., Hafren, A., and Hofius, D. (2017). Autophagy as a mediator of life and death in plants. *Current Opinion in Plant Biology* 40: 122-130.

Pubmed: [Author and Title](#)

Google Scholar: [Author Only](#) [Title Only](#) [Author and Title](#)

Vacca, R.A., Valenti, D., Bobba, A., Merafina, R.S., Passarella, S., and Marra, E. (2006). Cytochrome c is released in a reactive oxygen species-dependent manner and is degraded via caspase-like proteases in tobacco Bright-Yellow 2 cells en route to heat shock-induced cell death. *Plant Physiology* 141: 208-219.

Pubmed: [Author and Title](#)

Google Scholar: [Author Only](#) [Title Only](#) [Author and Title](#)

van Doorn, W.G., Beers, E.P., Dangl, J.L., Franklin-Tong, V.E., Gallois, P., Hara-Nishimura, I., Jones, A.M., Kawai-Yamada, M., Lam, E., Mundy, J., Mur, L.A.J., Petersen, M., Smertenko, A., Taliansky, M., Van Breusegem, F., Wolpert, T., Woltering, E., Zhivotovsky, B., and Bozhkov, P.V. (2011). Morphological classification of plant cell deaths. *Cell Death Differentiation* 18: 1241-1246.

Pubmed: [Author and Title](#)

Google Scholar: [Author Only](#) [Title Only](#) [Author and Title](#)

Van Durme, M., and Nowack, M.K. (2016). Mechanisms of developmentally controlled cell death in plants. *Current Opinion in Plant Biology* 29: 29-37.

Pubmed: [Author and Title](#)

Google Scholar: [Author Only](#) [Title Only](#) [Author and Title](#)

Vercammen, D., Van De Cotte, B., De Jaeger, G., Eeckhout, D., Casteels, P., Vandepoele, K., Vandenberghe, I., Van Beeumen, J., Inzé, D., and Van Breusegem, F. (2004). Type II metacaspases Atmc4 and Atmc9 of *Arabidopsis thaliana* cleave substrates after arginine and lysine. *Journal of Biological Chemistry* 279: 45329-45336.

Pubmed: [Author and Title](#)

Google Scholar: [Author Only](#) [Title Only](#) [Author and Title](#)

Vorster, B.J., Cullis, C., and Kunert, K. (2019). Plant Vacuolar Processing Enzymes. *Frontiers in Plant Science* 10: 479.

Pubmed: [Author and Title](#)

Google Scholar: [Author Only](#) [Title Only](#) [Author and Title](#)

Wang, P., Mugume, Y., and Bassham, D.C. (2018). New advances in autophagy in plants: regulation, selectivity and function. In *Seminars in cell & developmental biology* (Elsevier), pp. 113-122.

Pubmed: [Author and Title](#)

Google Scholar: [Author Only](#) [Title Only](#) [Author and Title](#)

Watanabe, N., and Lam, E. (2004). Recent advance in the study of caspase-like proteases and Bax inhibitor-1 in plants: their possible roles as regulator of programmed cell death. *Molecular Plant Pathology* 5: 65-70.

Pubmed: [Author and Title](#)

Google Scholar: [Author Only](#) [Title Only](#) [Author and Title](#)

White, K., Arama, E., and Hardwick, J.M. (2017). Controlling caspase activity in life and death. *PLoS genetics* 13: e1006545.

Pubmed: [Author and Title](#)

Google Scholar: [Author Only](#) [Title Only](#) [Author and Title](#)

Woltering, E.J., van der Bent, A., and Hoeberichts, F.A. (2002). Do plant caspases exist? *Plant Physiology* 130: 1764-1769.

Pubmed: [Author and Title](#)

Google Scholar: [Author Only](#) [Title Only](#) [Author and Title](#)

Xiong, Y., Contento, A.L., Nguyen, P.Q., and Bassham, D.C. (2007). Degradation of oxidized proteins by autophagy during oxidative stress in *Arabidopsis*. *Plant Physiology* 143: 291-299.

Pubmed: [Author and Title](#)

Google Scholar: [Author Only](#) [Title Only](#) [Author and Title](#)

**Yamada, K., Nishimura, M., and Hara-Nishimura, I. (2004). The slow wound-response of  $\gamma$ VPE is regulated by endogenous salicylic acid in *Arabidopsis*. *Planta* 218: 599-605.**

Pubmed: [Author and Title](#)

Google Scholar: [Author Only](#) [Title Only](#) [Author and Title](#)

**Yamada, K., Hara-Nishimura, I., and Nishimura, M. (2011). Unique defense strategy by the endoplasmic reticulum body in plants. *Plant and Cell Physiology* 52: 2039-2049.**

Pubmed: [Author and Title](#)

Google Scholar: [Author Only](#) [Title Only](#) [Author and Title](#)

**Yoshimoto, K., Hanaoka, H., Sato, S., Kato, T., Tabata, S., Noda, T., and Ohsumi, Y. (2004). Processing of ATG8s, ubiquitin-like proteins, and their deconjugation by ATG4s are essential for plant autophagy. *Plant Cell* 16: 2967-2983.**

Pubmed: [Author and Title](#)

Google Scholar: [Author Only](#) [Title Only](#) [Author and Title](#)

**Zhang, H., Dong, S., Wang, M., Wang, W., Song, W., Dou, X., Zheng, X., and Zhang, Z (2010). The role of vacuolar processing enzyme (VPE) from *Nicotiana benthamiana* in the elicitor-triggered hypersensitive response and stomatal closure. *Journal of Experimental Botany* 61: 3799–3812.**

Pubmed: [Author and Title](#)

Google Scholar: [Author Only](#) [Title Only](#) [Author and Title](#)

**Zhou, J., Yu, J.Q., and Chen, Z (2014). The perplexing role of autophagy in plant innate immune responses. *Molecular plant pathology* 15: 637-645.**

Pubmed: [Author and Title](#)

Google Scholar: [Author Only](#) [Title Only](#) [Author and Title](#)
